# Supplementary material for: Silencing of SRRM4 suppresses microexon inclusion and promotes tumor growth across cancers
Source: PubMed Central journal article supplement (PMC7935315; doi:10.1371/journal.pbio.3001138), 2021-02-23
Supplement: pbio.3001138.s035.pdf [file pbio.3001138.s035.pdf]

S11c Fig

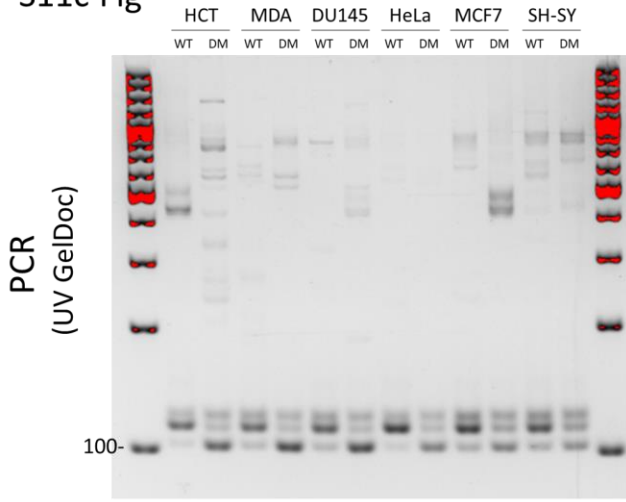

S14c Fig

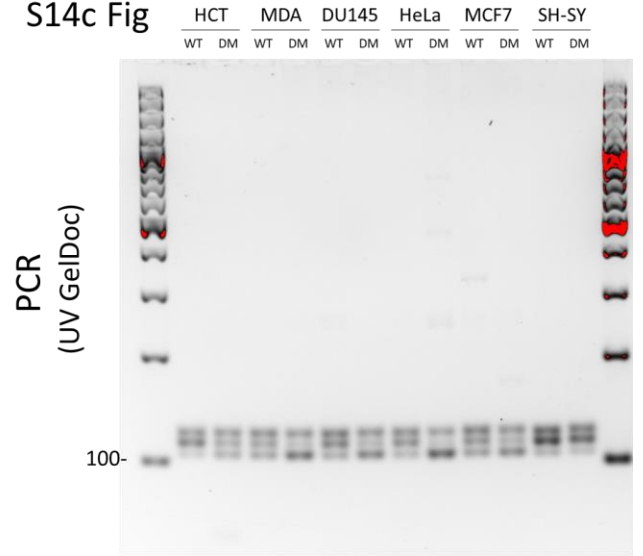

S12c Fig

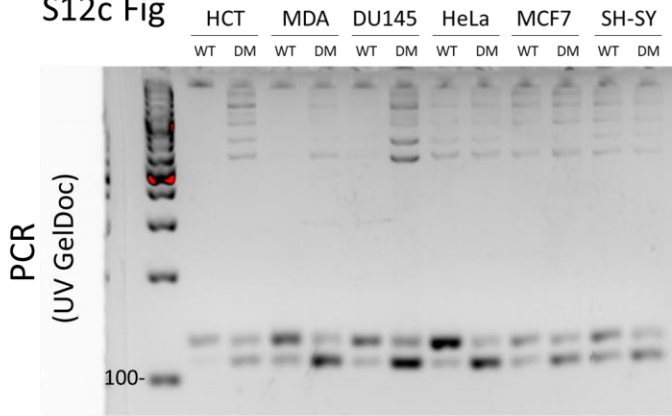

S15c Fig

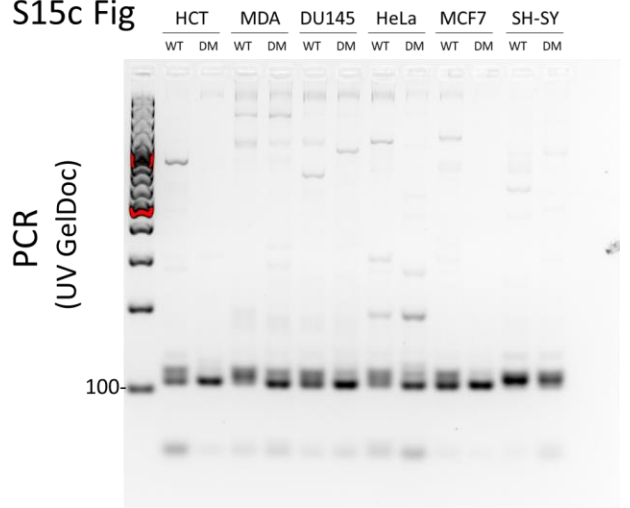

S13c Fig

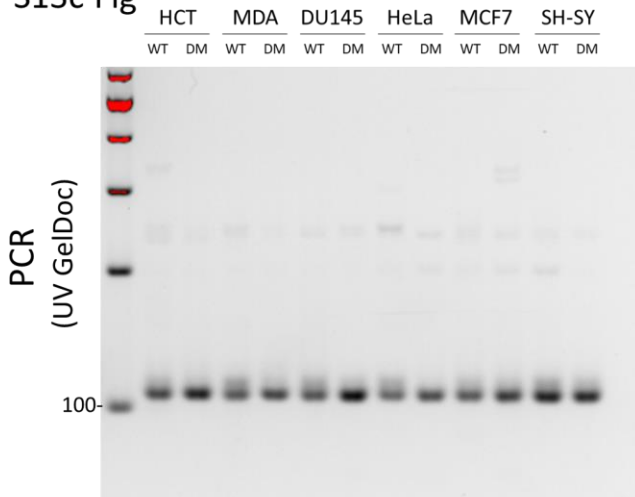

S16c Fig

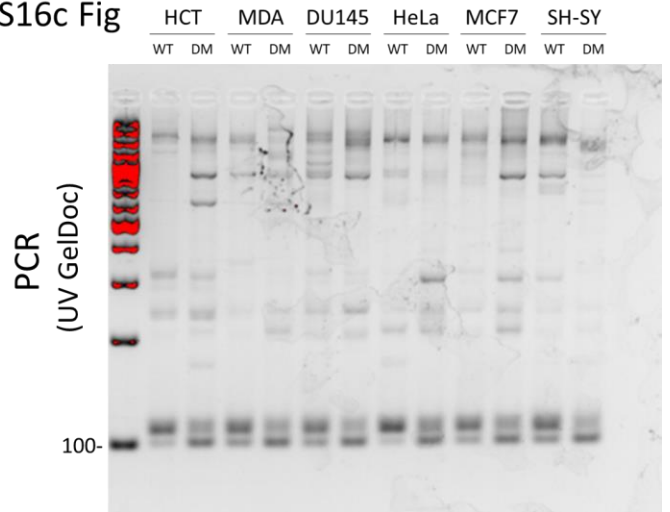

S7 Fig

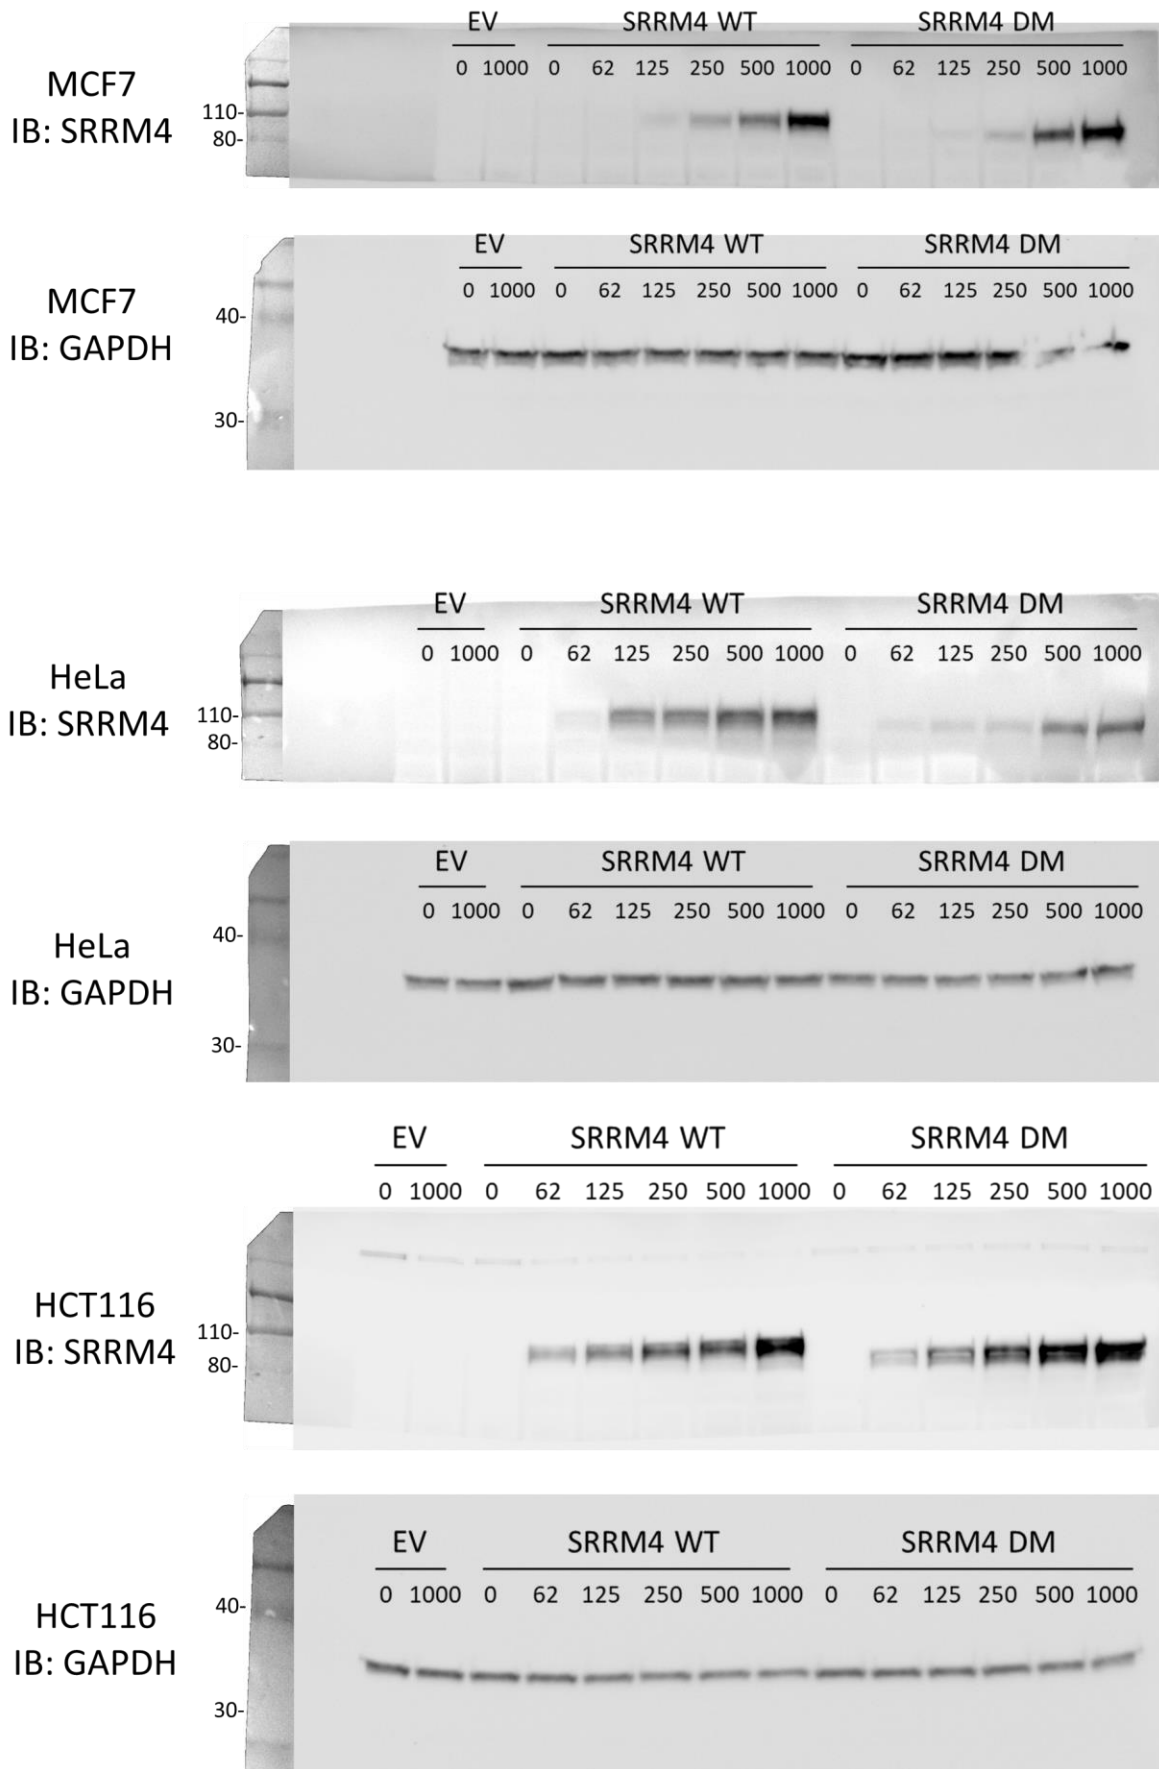

(Chemiluminescence LAS3000)

S7 Fig

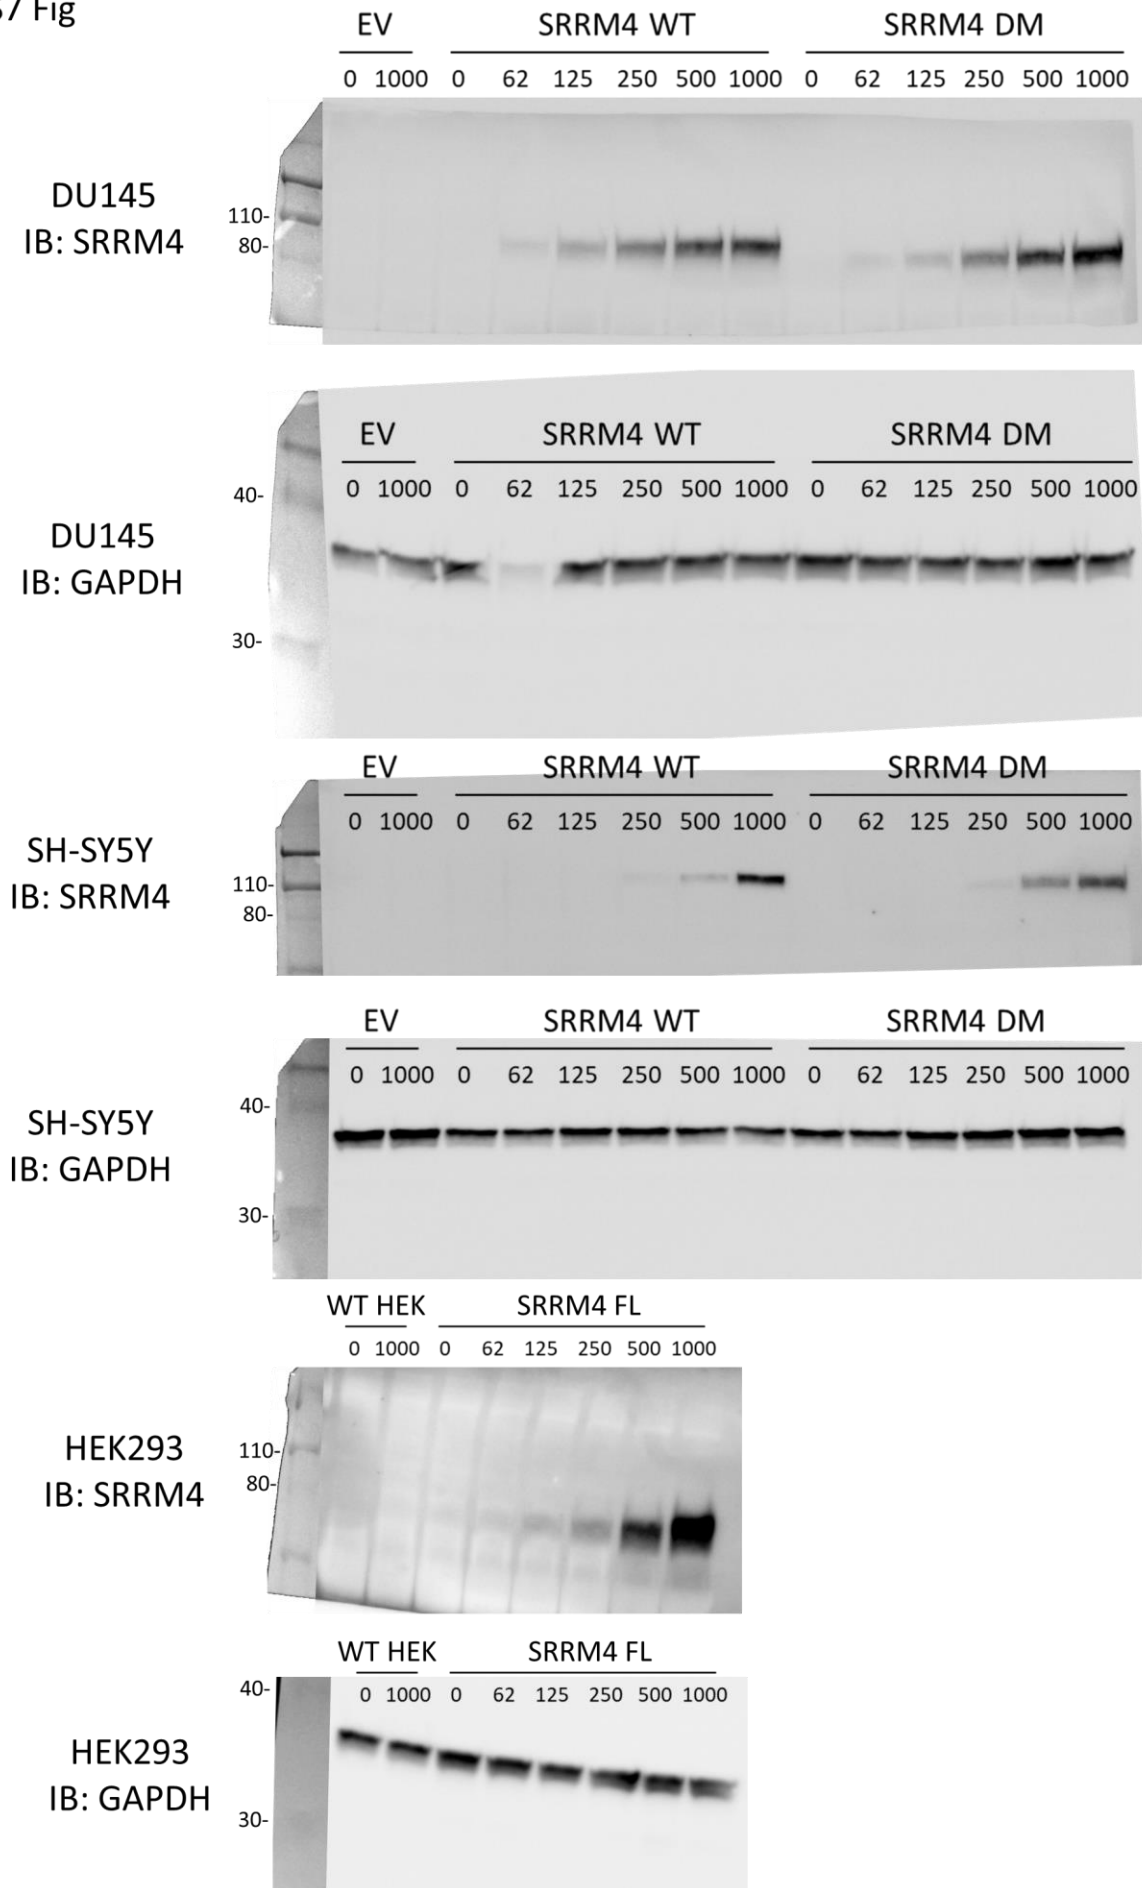

(Chemiluminescence LAS3000)
