# Supplementary material for: Silencing of SRRM4 suppresses microexon inclusion and promotes tumor growth across cancers
Source: PLoS Biol. 2021 Feb 23;19(2):e3001138. doi: 10.1371/journal.pbio.3001138 (PMC7935315; doi:10.1371/journal.pbio.3001138)
Supplement: S10 Data — Units of expression shown are cRPKM. SRRM4, Serine/Arginine Repetitive Matrix 4; WT, wild-type. (XLSX) [file pbio.3001138.s030.xlsx]

## Sheet: Sheet1
MDA-MB-231 Xenografts
ID	GENE	Induced tumor (I2)	Induced tumor (I14)	Induced tumor (Average)	Uninduced tumor (U19)	Ratio (Induced/Uninduced)
ENSG00000139767	SRRM4	36.12	34.28	35.2	0.19	185.263
ENSG00000103723	AP3B2	1.29	1.29	1.29	0.01	129
ENSG00000160716	CHRNB2	0.74	0.91	0.825	0.01	82.5
ENSG00000179674	ARL14	0.98	1.61	1.295	0.03	43.1667
ENSG00000171951	SCG2	17.25	23.3	20.275	0.49	41.3776
ENSG00000164061	BSN	1.65	1.66	1.655	0.04	41.375
ENSG00000254418	RP11-21L19.1	2.81	3.69	3.25	0.09	36.1111
ENSG00000176076	KCNE5	0.38	0.28	0.33	0.01	33
ENSG00000177679	SRRM3	1.5	1.38	1.44	0.05	28.8
ENSG00000125966	MMP24	1.45	1.82	1.635	0.06	27.25
ENSG00000166407	LMO1	0.24	0.28	0.26	0.01	26
ENSG00000167619	TMEM145	4.94	3.88	4.41	0.17	25.9412
ENSG00000171885	AQP4	0.47	0	0.235	0.01	23.5
ENSG00000163687	DNASE1L3	0.43	0.02	0.225	0.01	22.5
ENSG00000102003	SYP	15.06	13.49	14.275	0.64	22.3047
ENSG00000179331	RAB39A	7.35	8.12	7.735	0.35	22.1
ENSG00000251199	RP11-400D2.2	1.15	1.04	1.095	0.05	21.9
ENSG00000204279	PAGE3	0.45	0.79	0.62	0.03	20.6667
ENSG00000108309	RUNDC3A	0.82	0.81	0.815	0.04	20.375
ENSG00000125046	SSUH2	0.16	0.23	0.195	0.01	19.5
ENSG00000255501	CARD18	0.28	0.88	0.58	0.03	19.3333
ENSG00000260454	RP11-367F23.2	0.15	0.23	0.19	0.01	19
ENSG00000266401	RP11-874J12.4	0.07	0.31	0.19	0.01	19
ENSG00000059915	PSD	0.68	0.82	0.75	0.04	18.75
ENSG00000175175	PPM1E	2.73	3.15	2.94	0.16	18.375
ENSG00000276282	RP11-210K20.5	2.1	2.29	2.195	0.14	15.6786
ENSG00000124102	PI3	0.53	0.4	0.465	0.03	15.5
ENSG00000226650	KIF4B	0.16	0.15	0.155	0.01	15.5
ENSG00000172399	MYOZ2	2.27	2.25	2.26	0.15	15.0667
ENSG00000123496	IL13RA2	6.72	1.22	3.97	0.27	14.7037
ENSG00000258232	RP11-161H23.5	2.55	0.37	1.46	0.1	14.6
ENSG00000107187	LHX3	0.17	0.12	0.145	0.01	14.5
ENSG00000161681	SHANK1	0.14	0.15	0.145	0.01	14.5
ENSG00000267284	RP11-397A16.1	0.26	0.89	0.575	0.04	14.375
ENSG00000207468	SNORA19	3.51	2.65	3.08	0.22	14
ENSG00000250033	SLC7A11-AS1	0.42	0.42	0.42	0.03	14
ENSG00000272037	KB-431C1.5	0.15	0.12	0.135	0.01	13.5
ENSG00000008735	MAPK8IP2	0.23	0.3	0.265	0.02	13.25
ENSG00000232545	KB-318B8.7	0.69	1.12	0.905	0.07	12.9286
ENSG00000124196	GTSF1L	0.12	0.39	0.255	0.02	12.75
ENSG00000230825	AC005532.5	0.44	0.54	0.49	0.04	12.25
ENSG00000270178	RP11-494H4.3	1.09	0.6	0.845	0.07	12.0714
ENSG00000186648	CARMIL3	0.24	0.24	0.24	0.02	12
ENSG00000273211	RP13-131K19.7	0.43	0.53	0.48	0.04	12
ENSG00000117601	SERPINC1	0.13	0.1	0.115	0.01	11.5
ENSG00000174343	CHRNA9	0.1	0.13	0.115	0.01	11.5
ENSG00000261765	RP11-498D10.3	1.27	0.31	0.79	0.07	11.2857
ENSG00000255179	RP11-324J3.1	0.58	0.32	0.45	0.04	11.25
ENSG00000225554	RP11-527D7.1	6.06	11.44	8.75	0.78	11.2179
ENSG00000115602	IL1RL1	1.24	2.78	2.01	0.18	11.1667
ENSG00000189367	KIAA0408	9.63	11.47	10.55	0.98	10.7653
ENSG00000185674	LYG2	0.29	0.14	0.215	0.02	10.75
ENSG00000103316	CRYM	0.09	0.12	0.105	0.01	10.5
ENSG00000163606	CD200R1	0.07	0.14	0.105	0.01	10.5
ENSG00000169083	AR	0.21	0	0.105	0.01	10.5
ENSG00000237927	RP3-393E18.2	0.12	0.09	0.105	0.01	10.5
ENSG00000250509	CTC-573N18.1	0.22	0.2	0.21	0.02	10.5
ENSG00000267205	AC005954.4	0.65	0.61	0.63	0.06	10.5
ENSG00000258045	Metazoa_SRP	1.68	1.42	1.55	0.15	10.3333
ENSG00000149527	PLCH2	0.91	1.14	1.025	0.1	10.25
ENSG00000106258	CYP3A5	0.57	0.24	0.405	0.04	10.125
ENSG00000155265	GOLGA7B	5.68	4.92	5.3	0.53	10
ENSG00000260302	RP11-973H7.1	0.06	0.14	0.1	0.01	10
ENSG00000237200	ZBTB40-IT1	1.82	1.28	1.55	0.16	9.6875
ENSG00000269482	Z69720.2	0.57	0.59	0.58	0.06	9.66667
ENSG00000100505	TRIM9	1.12	1.35	1.235	0.13	9.5
ENSG00000126545	CSN1S1	0.14	0.24	0.19	0.02	9.5
ENSG00000135248	FAM71F1	0.1	0.09	0.095	0.01	9.5
ENSG00000139679	LPAR6	0.86	1.58	1.22	0.13	9.38462
ENSG00000162975	KCNF1	0.12	0.25	0.185	0.02	9.25
ENSG00000269067	ZNF728	0.24	0.13	0.185	0.02	9.25
ENSG00000214338	SOGA3	4.11	4.56	4.335	0.47	9.2234
ENSG00000240086	RP11-657O9.1	0.4	0.15	0.275	0.03	9.16667
ENSG00000188729	OSTN	3.36	3.02	3.19	0.35	9.11429
ENSG00000137673	MMP7	0.1	0.44	0.27	0.03	9
ENSG00000228952	LINC02041	0.85	0.77	0.81	0.09	9
ENSG00000053438	NNAT	0.07	0.11	0.09	0.01	9
ENSG00000087589	CASS4	0.07	0.11	0.09	0.01	9
ENSG00000205111	CDKL4	0.1	0.08	0.09	0.01	9
ENSG00000269911	FAM226B	0.06	0.12	0.09	0.01	9
ENSG00000272459	RP11-1277A3.3	0.45	0.27	0.36	0.04	9
ENSG00000269058	CALR3	0.3	0.23	0.265	0.03	8.83333
ENSG00000105605	CACNG7	1.28	0.96	1.12	0.13	8.61538
ENSG00000174680	GRIK1-AS1	0.17	0.17	0.17	0.02	8.5
ENSG00000185519	FAM131C	0.08	0.09	0.085	0.01	8.5
ENSG00000253898	LINC01419	0.15	0.52	0.335	0.04	8.375
ENSG00000162631	NTNG1	0.2	0.3	0.25	0.03	8.33333
ENSG00000263882	RN7SL774P	0.93	1.23	1.08	0.13	8.30769
ENSG00000212163	SNORD91A	1.69	0.27	0.98	0.12	8.16667
ENSG00000223725	AC007879.5	0.57	0.08	0.325	0.04	8.125
ENSG00000283199	ABC13-47488600E17.1	1.18	0.93	1.055	0.13	8.11538
ENSG00000260910	LINC00565	0.67	0.94	0.805	0.1	8.05
ENSG00000099994	SUSD2	0.06	0.1	0.08	0.01	8
ENSG00000131650	KREMEN2	0.11	0.05	0.08	0.01	8
ENSG00000155657	TTN	0.21	0.27	0.24	0.03	8
ENSG00000163060	TEKT4	0.06	0.1	0.08	0.01	8
ENSG00000179044	EXOC3L1	0.18	0.14	0.16	0.02	8
ENSG00000196353	CPNE4	0.29	0.19	0.24	0.03	8
ENSG00000260953	RP11-426C22.6	0.11	0.37	0.24	0.03	8
ENSG00000273240	RP11-455J20.3	0.17	0.31	0.24	0.03	8
ENSG00000115008	IL1A	3.54	6.82	5.18	0.65	7.96923
ENSG00000282977	PCBP2-OT1	0.73	0.7	0.715	0.09	7.94444
ENSG00000236213	AC006369.2	0.34	0.77	0.555	0.07	7.92857
ENSG00000198225	FKBP1C	0.21	0.26	0.235	0.03	7.83333
ENSG00000237476	LINC01637	0.17	0.3	0.235	0.03	7.83333
ENSG00000275857	AC009133.21	0.25	0.22	0.235	0.03	7.83333
ENSG00000254605	RP11-626H12.2	0.28	0.65	0.465	0.06	7.75
ENSG00000278849	RP11-327I22.5	0.14	0.17	0.155	0.02	7.75
ENSG00000233942	AC004012.1	0.5	0.12	0.31	0.04	7.75
ENSG00000235033	RP11-61I13.3	0.44	0.49	0.465	0.06	7.75
ENSG00000270820	RP11-355B11.2	0.16	0.46	0.31	0.04	7.75
ENSG00000272797	RP11-368I23.3	0.33	0.29	0.31	0.04	7.75
ENSG00000124103	FAM209A	0.39	0.69	0.54	0.07	7.71429
ENSG00000229901	RP11-399E6.4	0.3	0.62	0.46	0.06	7.66667
ENSG00000274929	RP11-165D7.5	0.21	0.25	0.23	0.03	7.66667
ENSG00000163395	IGFN1	1.33	0.81	1.07	0.14	7.64286
ENSG00000104237	RP1	0.36	0.25	0.305	0.04	7.625
ENSG00000203688	RP11-351J23.1	0.07	0.08	0.075	0.01	7.5
ENSG00000128011	LRFN1	0.06	0.09	0.075	0.01	7.5
ENSG00000155714	PDZD9	0.03	0.12	0.075	0.01	7.5
ENSG00000278002	RP11-596C23.2	0.03	0.12	0.075	0.01	7.5
ENSG00000232124	AP001057.1	0.36	0.09	0.225	0.03	7.5
ENSG00000266538	RP11-385D13.3	0.76	0.43	0.595	0.08	7.4375
ENSG00000084628	NKAIN1	0.28	0.31	0.295	0.04	7.375
ENSG00000258670	RP11-1042B17.3	0.43	0.16	0.295	0.04	7.375
ENSG00000179817	MRGPRX4	0.26	0.18	0.22	0.03	7.33333
ENSG00000198576	ARC	0.47	0.85	0.66	0.09	7.33333
ENSG00000175274	TP53I11	0.21	0.52	0.365	0.05	7.3
ENSG00000095587	TLL2	0.1	0.19	0.145	0.02	7.25
ENSG00000224699	LAMTOR5-AS1	0.19	0.1	0.145	0.02	7.25
ENSG00000274184	RP11-158H5.8	0.12	0.17	0.145	0.02	7.25
ENSG00000147206	NXF3	0.21	0.08	0.145	0.02	7.25
ENSG00000198929	NOS1AP	1.58	1.75	1.665	0.23	7.23913
ENSG00000211752	TRBV27	0.44	0.28	0.36	0.05	7.2
ENSG00000174827	PDZK1	0.78	0.94	0.86	0.12	7.16667
ENSG00000263916	RP11-110H1.4	0.39	0.18	0.285	0.04	7.125
ENSG00000228251	AC012442.6	0.16	0.41	0.285	0.04	7.125
ENSG00000269068	RP11-256I23.2	0.49	0.5	0.495	0.07	7.07143
ENSG00000106089	STX1A	159.36	121.65	140.505	19.91	7.05701
ENSG00000130055	GDPD2	0.07	0.07	0.07	0.01	7
ENSG00000138622	HCN4	0.08	0.06	0.07	0.01	7
ENSG00000166800	LDHAL6A	0.07	0.07	0.07	0.01	7
ENSG00000227195	MIR663AHG	0.12	0.16	0.14	0.02	7
ENSG00000254477	AP000640.10	0.16	0.12	0.14	0.02	7
ENSG00000279987	AC008103.4	0.03	0.25	0.14	0.02	7
ENSG00000152463	OLAH	0.56	0.84	0.7	0.1	7
ENSG00000147174	GCNA	3.81	7.29	5.55	0.8	6.9375
ENSG00000206633	SNORA80B	2.28	1.04	1.66	0.24	6.91667
ENSG00000254539	RP4-791M13.3	12.34	14.82	13.58	1.97	6.8934
ENSG00000253307	RP11-10J21.4	1.99	0.61	1.3	0.19	6.84211
ENSG00000253877	LINC01608	0.26	0.15	0.205	0.03	6.83333
ENSG00000122877	EGR2	1.72	2.64	2.18	0.32	6.8125
ENSG00000164266	SPINK1	1.84	5.99	3.915	0.58	6.75
ENSG00000241886	RP11-242C19.2	0.72	0.63	0.675	0.1	6.75
ENSG00000279516	FAM230C	0.1	0.17	0.135	0.02	6.75
ENSG00000235795	RP11-421L21.2	0.09	0.31	0.2	0.03	6.66667
ENSG00000259331	RP11-57P19.1	0.3	0.1	0.2	0.03	6.66667
ENSG00000236453	AC003092.1	1.14	2.94	2.04	0.31	6.58065
ENSG00000270059	RP11-88H12.2	5.08	3.56	4.32	0.66	6.54545
ENSG00000058866	DGKG	0.22	0.3	0.26	0.04	6.5
ENSG00000182393	IFNL1	0.03	0.23	0.13	0.02	6.5
ENSG00000186049	KRT73	0.07	0.06	0.065	0.01	6.5
ENSG00000189045	ANKDD1B	0.07	0.06	0.065	0.01	6.5
ENSG00000197444	OGDHL	0.03	0.1	0.065	0.01	6.5
ENSG00000204666	CTD-2126E3.1	0.01	0.12	0.065	0.01	6.5
ENSG00000246366	LACTB2-AS1	0.08	0.05	0.065	0.01	6.5
ENSG00000255502	RP11-379J13.2	0.13	0.13	0.13	0.02	6.5
ENSG00000259828	RP11-63E9.1	0.05	0.08	0.065	0.01	6.5
ENSG00000260339	HEXA-AS1	0.06	0.07	0.065	0.01	6.5
ENSG00000260412	RP11-438B23.2	0.06	0.07	0.065	0.01	6.5
ENSG00000261823	RP11-48G14.1	0.02	0.24	0.13	0.02	6.5
ENSG00000263494	AC004702.2	0.57	1.77	1.17	0.18	6.5
ENSG00000271265	RP11-230C9.4	0.23	0.29	0.26	0.04	6.5
ENSG00000271856	LINC01215	0.12	0.14	0.13	0.02	6.5
ENSG00000275714	HIST1H3A	0.32	0.33	0.325	0.05	6.5
ENSG00000263370	RP11-68I3.5	0.5	0.52	0.51	0.08	6.375
ENSG00000252050	SNORA31	1.14	1.65	1.395	0.22	6.34091
ENSG00000259712	CTD-2184D3.5	0.09	0.29	0.19	0.03	6.33333
ENSG00000107742	SPOCK2	0.1	0.15	0.125	0.02	6.25
ENSG00000214510	SPINK13	0.15	0.1	0.125	0.02	6.25
ENSG00000226124	FTCDNL1	0.39	0.36	0.375	0.06	6.25
ENSG00000241475	RP4-781K5.5	0.16	0.34	0.25	0.04	6.25
ENSG00000257052	RP11-881M11.2	0.15	0.1	0.125	0.02	6.25
ENSG00000274427	RP11-972P1.10	0.3	0.81	0.555	0.09	6.16667
ENSG00000240106	RN7SL146P	0.38	0.47	0.425	0.07	6.07143
ENSG00000233547	RP11-57H14.2	0.9	1.16	1.03	0.17	6.05882
ENSG00000166670	MMP10	2.05	3.63	2.84	0.47	6.04255
ENSG00000115085	ZAP70	0.06	0.06	0.06	0.01	6
ENSG00000126583	PRKCG	0.45	0.27	0.36	0.06	6
ENSG00000152207	CYSLTR2	0.08	0.16	0.12	0.02	6
ENSG00000166523	CLEC4E	0.04	0.08	0.06	0.01	6
ENSG00000169676	DRD5	0.04	0.08	0.06	0.01	6
ENSG00000173212	MAB21L3	0.06	0.06	0.06	0.01	6
ENSG00000175946	KLHL38	0.11	0.13	0.12	0.02	6
ENSG00000181585	TMIE	0.07	0.05	0.06	0.01	6
ENSG00000187824	TMEM220	0.09	0.03	0.06	0.01	6
ENSG00000203565	RP13-259N13.2	0.26	0.46	0.36	0.06	6
ENSG00000227078	LINC02094	0.08	0.4	0.24	0.04	6
ENSG00000249734	RP11-332J15.1	0.4	0.08	0.24	0.04	6
ENSG00000258943	RP11-696D21.2	0.19	0.05	0.12	0.02	6
ENSG00000272515	RP11-29P20.1	0.03	0.09	0.06	0.01	6
ENSG00000280739	EIF1B-AS1	0.07	0.05	0.06	0.01	6
ENSG00000282041	CTA-286B10.8	0.23	0.37	0.3	0.05	6
ENSG00000185386	MAPK11	5.07	4.98	5.025	0.84	5.98214
ENSG00000176945	MUC20	0.35	0.48	0.415	0.07	5.92857
ENSG00000249509	RP11-402J6.1	0.38	0.33	0.355	0.06	5.91667
ENSG00000259735	RP11-356M20.3	0.48	0.11	0.295	0.05	5.9
ENSG00000265355	MIR3136	1.92	5.26	3.59	0.61	5.88525
ENSG00000255236	CTD-2655K5.1	0.25	0.22	0.235	0.04	5.875
ENSG00000170323	FABP4	0.93	0.71	0.82	0.14	5.85714
ENSG00000196549	MME	0.24	0.11	0.175	0.03	5.83333
ENSG00000198033	TUBA3C	0.06	0.64	0.35	0.06	5.83333
ENSG00000270933	CTD-2227E11.1	0.05	0.3	0.175	0.03	5.83333
ENSG00000263932	MIR4448	10.1	8.66	9.38	1.61	5.82609
ENSG00000270031	RP3-426I6.6	1.43	0.55	0.99	0.17	5.82353
ENSG00000275097	RP11-627K11.6	0.57	0.71	0.64	0.11	5.81818
ENSG00000275853	Metazoa_SRP	1.37	1.18	1.275	0.22	5.79545
ENSG00000264879	RN7SL690P	0.74	2.03	1.385	0.24	5.77083
ENSG00000183150	GPR19	1.16	2.64	1.9	0.33	5.75758
ENSG00000126950	TMEM35A	0.38	0.08	0.23	0.04	5.75
ENSG00000241696	LINC02053	0.1	0.13	0.115	0.02	5.75
ENSG00000266171	RP11-769O8.1	0.13	0.1	0.115	0.02	5.75
ENSG00000270871	AC015849.19	0.27	0.19	0.23	0.04	5.75
ENSG00000060566	CREB3L3	0.15	0.08	0.115	0.02	5.75
ENSG00000149926	FAM57B	0.21	0.02	0.115	0.02	5.75
ENSG00000228613	AC144450.1	0.15	0.08	0.115	0.02	5.75
ENSG00000232860	SMG7-AS1	0.11	0.12	0.115	0.02	5.75
ENSG00000268401	CTC-344H19.4	0.41	0.39	0.4	0.07	5.71429
ENSG00000236953	ZDHHC20-IT1	0.28	0.29	0.285	0.05	5.7
ENSG00000127362	TAS2R3	0.07	0.27	0.17	0.03	5.66667
ENSG00000231966	RP11-12M5.4	0.3	0.38	0.34	0.06	5.66667
ENSG00000234699	RP11-225H22.4	0.09	0.25	0.17	0.03	5.66667
ENSG00000248773	RP11-231L11.3	0.86	0.83	0.845	0.15	5.63333
ENSG00000120337	TNFSF18	0.06	0.39	0.225	0.04	5.625
ENSG00000214942	AC113167.1	0.13	0.32	0.225	0.04	5.625
ENSG00000260698	RP11-439E19.9	0.22	0.23	0.225	0.04	5.625
ENSG00000270557	RP11-546J1.1	0.31	0.14	0.225	0.04	5.625
ENSG00000261175	LINC02188	0.41	0.04	0.225	0.04	5.625
ENSG00000274698	RP11-71L14.4	0.3	0.15	0.225	0.04	5.625
ENSG00000276918	Metazoa_SRP	0.4	0.61	0.505	0.09	5.61111
ENSG00000254484	CTA-797E19.1	0.3	0.26	0.28	0.05	5.6
ENSG00000155622	XAGE2	0.97	3.47	2.22	0.4	5.55
ENSG00000136425	CIB2	0.08	0.14	0.11	0.02	5.5
ENSG00000145700	ANKRD31	0.07	0.04	0.055	0.01	5.5
ENSG00000154451	GBP5	0.16	0.28	0.22	0.04	5.5
ENSG00000158683	PKD1L1	0.07	0.04	0.055	0.01	5.5
ENSG00000173389	IQCF1	0.06	0.27	0.165	0.03	5.5
ENSG00000270816	LINC00221	0.07	0.04	0.055	0.01	5.5
ENSG00000271811	RP1-79C4.4	0.07	0.04	0.055	0.01	5.5
ENSG00000012223	LTF	0.08	0.03	0.055	0.01	5.5
ENSG00000103375	AQP8	0.1	0.01	0.055	0.01	5.5
ENSG00000116254	CHD5	0.28	0.27	0.275	0.05	5.5
ENSG00000117477	CCDC181	0.16	0.06	0.11	0.02	5.5
ENSG00000131386	GALNT15	0.05	0.06	0.055	0.01	5.5
ENSG00000137266	SLC22A23	0.05	0.06	0.055	0.01	5.5
ENSG00000143994	ABHD1	0.05	0.06	0.055	0.01	5.5
ENSG00000179603	GRM8	0.01	0.1	0.055	0.01	5.5
ENSG00000184735	DDX53	0.06	0.05	0.055	0.01	5.5
ENSG00000214140	PRCD	0.09	0.13	0.11	0.02	5.5
ENSG00000228137	AP001469.7	0.27	0.28	0.275	0.05	5.5
ENSG00000230768	LINC01676	0.03	0.08	0.055	0.01	5.5
ENSG00000246662	LINC00535	0.02	0.09	0.055	0.01	5.5
ENSG00000249258	RP11-468H14.2	0.36	0.19	0.275	0.05	5.5
ENSG00000258811	CTD-3051D23.1	0.03	0.08	0.055	0.01	5.5
ENSG00000262211	CTD-2031P19.5	0.32	0.23	0.275	0.05	5.5
ENSG00000183397	C19orf71	0.24	0.09	0.165	0.03	5.5
ENSG00000244203	FOXP1-AS1	0.21	0.12	0.165	0.03	5.5
ENSG00000272788	RP11-674N23.4	0.37	0.29	0.33	0.06	5.5
ENSG00000229325	ACAP2-IT1	3.67	3.27	3.47	0.64	5.42187
ENSG00000259017	RP11-561B11.6	0.38	0.59	0.485	0.09	5.38889
ENSG00000258623	CTD-2325P2.3	1.21	1.16	1.185	0.22	5.38636
ENSG00000204287	HLA-DRA	1.23	0.6	0.915	0.17	5.38235
ENSG00000200816	SNORA38	1.34	0.92	1.13	0.21	5.38095
ENSG00000283740	RP11-432M8.22	0.13	0.3	0.215	0.04	5.375
ENSG00000207370	Y_RNA	0.88	2.12	1.5	0.28	5.35714
ENSG00000284595	MIR6785	2.31	3.57	2.94	0.55	5.34545
ENSG00000249310	APOBEC3B-AS1	0.2	0.12	0.16	0.03	5.33333
ENSG00000249898	MCPH1-AS1	0.28	0.25	0.265	0.05	5.3
ENSG00000274008	Metazoa_SRP	0.89	1.12	1.005	0.19	5.28947
ENSG00000105639	JAK3	0.31	0.11	0.21	0.04	5.25
ENSG00000146192	FGD2	1	0.26	0.63	0.12	5.25
ENSG00000151632	AKR1C2	0.46	0.38	0.42	0.08	5.25
ENSG00000166349	RAG1	0.09	0.12	0.105	0.02	5.25
ENSG00000174567	GOLT1A	0.07	0.14	0.105	0.02	5.25
ENSG00000184697	CLDN6	0.08	0.13	0.105	0.02	5.25
ENSG00000226453	RP11-379B8.1	0.14	0.07	0.105	0.02	5.25
ENSG00000229983	RP11-15I11.2	0.09	0.33	0.21	0.04	5.25
ENSG00000230498	RP4-564M11.2	0.5	0.34	0.42	0.08	5.25
ENSG00000231971	RP11-557H15.3	0.23	0.19	0.21	0.04	5.25
ENSG00000232053	AC009784.3	0.38	0.25	0.315	0.06	5.25
ENSG00000236514	RP11-162G10.5	0.14	0.07	0.105	0.02	5.25
ENSG00000263466	RP1-56K13.2	0.31	0.32	0.315	0.06	5.25
ENSG00000273302	RP11-493E12.2	0.08	0.13	0.105	0.02	5.25
ENSG00000126550	HTN1	0.99	1.63	1.31	0.25	5.24
ENSG00000252684	RNU6ATAC36P	5.97	0	2.985	0.57	5.23684
ENSG00000200742	Y_RNA	6.17	0.71	3.44	0.66	5.21212
ENSG00000229195	AC009495.4	0.17	0.35	0.26	0.05	5.2
ENSG00000158050	DUSP2	0.55	0.8	0.675	0.13	5.19231
ENSG00000134548	SPX	0.39	0.44	0.415	0.08	5.1875
ENSG00000112182	BACH2	0.36	0.57	0.465	0.09	5.16667
ENSG00000220256	AC093802.1	0.17	0.24	0.205	0.04	5.125
ENSG00000228198	OR2M3	0.85	0.38	0.615	0.12	5.125
ENSG00000235885	LINC01828	0.39	0.84	0.615	0.12	5.125
ENSG00000156453	PCDH1	6.93	10.33	8.63	1.69	5.10651
ENSG00000143110	C1orf162	0.17	0.54	0.355	0.07	5.07143
ENSG00000249413	RP11-25H12.1	0.41	0.3	0.355	0.07	5.07143
ENSG00000135625	EGR4	0.41	0.4	0.405	0.08	5.0625
ENSG00000189056	RELN	1.28	1.34	1.31	0.26	5.03846
ENSG00000244491	RP3-508I15.18	0.4	0.2	0.3	0.06	5
ENSG00000247130	RP11-366H4.3	0.46	0.14	0.3	0.06	5
ENSG00000249738	AC008697.1	0.1	0.2	0.15	0.03	5
ENSG00000004809	SLC22A16	0.02	0.08	0.05	0.01	5
ENSG00000102409	BEX4	0.31	0.29	0.3	0.06	5
ENSG00000112077	RHAG	0.05	0.05	0.05	0.01	5
ENSG00000113302	IL12B	0.02	0.08	0.05	0.01	5
ENSG00000125998	FAM83C	0.02	0.08	0.05	0.01	5
ENSG00000127578	WFIKKN1	0.04	0.06	0.05	0.01	5
ENSG00000128918	ALDH1A2	0.03	0.07	0.05	0.01	5
ENSG00000130881	LRP3	0.22	0.38	0.3	0.06	5
ENSG00000162398	LEXM	0.1	0.1	0.1	0.02	5
ENSG00000162782	TDRD5	0.02	0.08	0.05	0.01	5
ENSG00000171557	FGG	0.06	0.04	0.05	0.01	5
ENSG00000179915	NRXN1	0.13	0.07	0.1	0.02	5
ENSG00000186526	CYP4F8	0.16	0.04	0.1	0.02	5
ENSG00000197587	DMBX1	0.08	0.02	0.05	0.01	5
ENSG00000198601	OR2M2	0.05	0.45	0.25	0.05	5
ENSG00000215018	COL28A1	0.05	0.05	0.05	0.01	5
ENSG00000223865	HLA-DPB1	0.15	0.05	0.1	0.02	5
ENSG00000224924	LINC00320	0.04	0.06	0.05	0.01	5
ENSG00000232684	ATP11A-AS1	0.1	0	0.05	0.01	5
ENSG00000249917	LINC00536	0.06	0.04	0.05	0.01	5
ENSG00000250237	CTC-498J12.1	0.1	0.4	0.25	0.05	5
ENSG00000260423	RP13-735L24.1	0.04	0.06	0.05	0.01	5
ENSG00000261242	CTD-2302E22.4	0.05	0.15	0.1	0.02	5
ENSG00000261916	RP11-235E17.4	0.92	0.58	0.75	0.15	5
ENSG00000263683	RP4-777O23.1	0.1	0.4	0.25	0.05	5
ENSG00000270002	RP11-93H12.4	0.03	0.07	0.05	0.01	5
ENSG00000272068	RP11-284F21.9	0.18	0.22	0.2	0.04	5
ENSG00000213886	UBD	0.18	0.02	0.1	0.02	5
ENSG00000283627	RP11-151G14.2	0.76	0.43	0.595	0.12	4.95833
ENSG00000276742	RP11-500G22.4	0.48	0.21	0.345	0.07	4.92857
ENSG00000263410	RN7SL460P	0.56	0.72	0.64	0.13	4.92308
ENSG00000236641	CTA-221G9.7	0.13	0.26	0.195	0.04	4.875
ENSG00000276757	RN7SL192P	0.22	0.46	0.34	0.07	4.85714
ENSG00000201573	Y_RNA	1.4	1.8	1.6	0.33	4.84848
ENSG00000205085	FAM71F2	1.17	1.25	1.21	0.25	4.84
ENSG00000265917	MIR3685	1.42	11.73	6.575	1.36	4.83456
ENSG00000149968	MMP3	0.98	1.05	1.015	0.21	4.83333
ENSG00000226763	SRRM5	0.12	0.17	0.145	0.03	4.83333
ENSG00000269752	CTD-3149D2.3	0.67	0.2	0.435	0.09	4.83333
ENSG00000271743	CTD-2541M15.3	0.02	0.27	0.145	0.03	4.83333
ENSG00000277299	RP11-837J7.4	0.16	0.13	0.145	0.03	4.83333
ENSG00000262165	RP11-81A22.5	0.25	0.04	0.145	0.03	4.83333
ENSG00000276026	RP4-545L17.11	0.23	0.83	0.53	0.11	4.81818
ENSG00000265750	RP11-799B12.4	0.78	0.47	0.625	0.13	4.80769
ENSG00000189320	FAM180A	2.83	1.3	2.065	0.43	4.80233
ENSG00000255320	RP11-755F10.1	0.32	0.16	0.24	0.05	4.8
ENSG00000272638	GS1-114I9.1	0.72	0.72	0.72	0.15	4.8
ENSG00000226758	DISC1-IT1	0.92	1.09	1.005	0.21	4.78571
ENSG00000238129	RP3-410C9.2	0.31	0.36	0.335	0.07	4.78571
ENSG00000258038	CTD-2384A14.1	0.48	0.19	0.335	0.07	4.78571
ENSG00000260896	LINC02170	0.6	2.36	1.48	0.31	4.77419
ENSG00000263551	RP11-78F17.1	0.28	0.96	0.62	0.13	4.76923
ENSG00000257156	RP11-13A1.3	0.4	0.17	0.285	0.06	4.75
ENSG00000141434	MEP1B	0.09	0.1	0.095	0.02	4.75
ENSG00000166825	ANPEP	0.08	0.11	0.095	0.02	4.75
ENSG00000203886	CYP17A1-AS1	0.29	0.09	0.19	0.04	4.75
ENSG00000226308	RP4-813D12.3	0.14	0.05	0.095	0.02	4.75
ENSG00000232100	LINC01653	0.11	0.08	0.095	0.02	4.75
ENSG00000254006	RP11-1D12.2	0.05	0.14	0.095	0.02	4.75
ENSG00000273209	RP11-107N15.1	0.08	0.11	0.095	0.02	4.75
ENSG00000198513	ATL1	16.42	16.55	16.485	3.5	4.71
ENSG00000236889	RP11-38J22.1	0.58	0.17	0.375	0.08	4.6875
ENSG00000050730	TNIP3	0.13	0.15	0.14	0.03	4.66667
ENSG00000186051	TAL2	0.06	0.22	0.14	0.03	4.66667
ENSG00000260186	LINC02137	0.07	0.21	0.14	0.03	4.66667
ENSG00000272389	CTC-487M23.7	0.12	0.44	0.28	0.06	4.66667
ENSG00000272941	RP11-134L10.1	0.14	0.14	0.14	0.03	4.66667
ENSG00000175874	CREG2	0.2	0.17	0.185	0.04	4.625
ENSG00000189366	ALG1L	0.53	0.3	0.415	0.09	4.61111
ENSG00000242436	RN7SL789P	0.18	0.65	0.415	0.09	4.61111
ENSG00000034053	APBA2	2.45	3.08	2.765	0.6	4.60833
ENSG00000135976	ANKRD36	4.34	4.23	4.285	0.93	4.60753
ENSG00000237685	RP11-360O19.4	0.21	0.25	0.23	0.05	4.6
ENSG00000181016	LSMEM1	3.6	3.39	3.495	0.76	4.59868
ENSG00000271259	RP11-1109F11.5	0.41	0.23	0.32	0.07	4.57143
ENSG00000102128	RAB40AL	0.08	0.65	0.365	0.08	4.5625
ENSG00000221878	PSG7	0.49	0.24	0.365	0.08	4.5625
ENSG00000254577	RP11-484D2.4	1.52	0.85	1.185	0.26	4.55769
ENSG00000113263	ITK	0.26	0.56	0.41	0.09	4.55556
ENSG00000243738	RN7SL181P	0.45	0.37	0.41	0.09	4.55556
ENSG00000176907	C8orf4	2.95	2.47	2.71	0.6	4.51667
ENSG00000188760	TMEM198	3.16	3.15	3.155	0.7	4.50714
ENSG00000115165	CYTIP	0.08	0.19	0.135	0.03	4.5
ENSG00000237836	PHKA2-AS1	0.27	0	0.135	0.03	4.5
ENSG00000261229	RP11-38G5.4	0.05	0.22	0.135	0.03	4.5
ENSG00000270894	AC015849.13	0.3	0.24	0.27	0.06	4.5
ENSG00000271334	LINC02104	0.17	0.1	0.135	0.03	4.5
ENSG00000005844	ITGAL	0.07	0.02	0.045	0.01	4.5
ENSG00000077063	CTTNBP2	0.03	0.06	0.045	0.01	4.5
ENSG00000106384	MOGAT3	0.06	0.03	0.045	0.01	4.5
ENSG00000121570	DPPA4	0.05	0.04	0.045	0.01	4.5
ENSG00000129990	SYT5	0.05	0.04	0.045	0.01	4.5
ENSG00000130822	PNCK	0.09	0	0.045	0.01	4.5
ENSG00000133454	MYO18B	0.04	0.05	0.045	0.01	4.5
ENSG00000141506	PIK3R5	0.14	0.04	0.09	0.02	4.5
ENSG00000150625	GPM6A	0.08	0.1	0.09	0.02	4.5
ENSG00000161180	CCDC116	0.07	0.11	0.09	0.02	4.5
ENSG00000167178	ISLR2	0.04	0.05	0.045	0.01	4.5
ENSG00000173208	ABCD2	0.06	0.03	0.045	0.01	4.5
ENSG00000173338	KCNK7	0.07	0.11	0.09	0.02	4.5
ENSG00000177875	CCDC184	0.04	0.05	0.045	0.01	4.5
ENSG00000179057	IGSF22	0.04	0.05	0.045	0.01	4.5
ENSG00000184361	SPATA32	0.01	0.08	0.045	0.01	4.5
ENSG00000185332	TMEM105	0.05	0.04	0.045	0.01	4.5
ENSG00000187595	ZNF385C	0.05	0.04	0.045	0.01	4.5
ENSG00000188394	GPR21	0.13	0.05	0.09	0.02	4.5
ENSG00000188677	PARVB	0.06	0.12	0.09	0.02	4.5
ENSG00000229867	STEAP3-AS1	0.08	0.01	0.045	0.01	4.5
ENSG00000232748	RP11-196G11.6	0.04	0.05	0.045	0.01	4.5
ENSG00000238133	MAP3K20-AS1	0.03	0.06	0.045	0.01	4.5
ENSG00000241413	RN7SL441P	0.39	0.24	0.315	0.07	4.5
ENSG00000254587	RP11-360K13.1	0.08	0.01	0.045	0.01	4.5
ENSG00000266304	RP11-484N16.1	0.17	0.28	0.225	0.05	4.5
ENSG00000270885	RASL10B	0.04	0.05	0.045	0.01	4.5
ENSG00000271447	MMP28	0.03	0.06	0.045	0.01	4.5
ENSG00000272733	KB-208E9.1	0.14	0.04	0.09	0.02	4.5
ENSG00000272933	RP11-47A8.5	0.06	0.03	0.045	0.01	4.5
ENSG00000273618	RP11-66N24.7	0.04	0.05	0.045	0.01	4.5
ENSG00000281731	RP11-384K6.8	0.05	0.04	0.045	0.01	4.5
ENSG00000260233	SSSCA1-AS1	0.33	0.47	0.4	0.09	4.44444
ENSG00000274677	RP11-505K9.5	0.46	0.34	0.4	0.09	4.44444
ENSG00000158423	RIBC1	0.44	0.27	0.355	0.08	4.4375
ENSG00000272854	RP4-593H12.1	0.33	0.38	0.355	0.08	4.4375
ENSG00000221164	SNORA11	4.21	6.5	5.355	1.21	4.42562
ENSG00000012124	CD22	1.27	1.56	1.415	0.32	4.42188
ENSG00000181722	ZBTB20	0.22	0.31	0.265	0.06	4.41667
ENSG00000281538	RP4-669P10.20	0.7	1.24	0.97	0.22	4.40909
ENSG00000106278	PTPRZ1	1.37	0.74	1.055	0.24	4.39583
ENSG00000264592	RN7SL131P	0.45	0.77	0.61	0.14	4.35714
ENSG00000213167	Metazoa_SRP	0.54	0.33	0.435	0.1	4.35
ENSG00000179826	MRGPRX3	2.28	1.98	2.13	0.49	4.34694
ENSG00000111713	GYS2	0.16	0.1	0.13	0.03	4.33333
ENSG00000223770	AC006145.4	0.13	0.13	0.13	0.03	4.33333
ENSG00000226661	RP5-1139I1.2	0.03	0.23	0.13	0.03	4.33333
ENSG00000227463	RP11-158D2.2	0.12	0.14	0.13	0.03	4.33333
ENSG00000250974	LINC02196	0.04	0.22	0.13	0.03	4.33333
ENSG00000249790	RP11-20D14.6	2.28	3.6	2.94	0.68	4.32353
ENSG00000273725	Metazoa_SRP	0.71	0.24	0.475	0.11	4.31818
ENSG00000258904	RP11-638I2.2	1.34	1.68	1.51	0.35	4.31429
ENSG00000163492	CCDC141	0.39	0.3	0.345	0.08	4.3125
ENSG00000179148	ALOXE3	0.18	0.25	0.215	0.05	4.3
ENSG00000224358	RP11-466F5.8	0.21	0.22	0.215	0.05	4.3
ENSG00000224707	E2F3-IT1	0.16	0.27	0.215	0.05	4.3
ENSG00000254130	LINC01947	0.22	0.38	0.3	0.07	4.28571
ENSG00000270882	HIST2H4A	4.85	8.79	6.82	1.6	4.2625
ENSG00000086205	FOLH1	0.16	0.01	0.085	0.02	4.25
ENSG00000105499	PLA2G4C	3.05	2.9	2.975	0.7	4.25
ENSG00000159674	SPON2	0.04	0.13	0.085	0.02	4.25
ENSG00000227248	FAM155A-IT1	0.1	0.07	0.085	0.02	4.25
ENSG00000259221	CTD-2050N2.1	0.07	0.1	0.085	0.02	4.25
ENSG00000266976	AC079466.1	0.07	0.1	0.085	0.02	4.25
ENSG00000099284	H2AFY2	0.05	0.12	0.085	0.02	4.25
ENSG00000101203	COL20A1	0.06	0.11	0.085	0.02	4.25
ENSG00000124915	DKFZP434K028	0.08	0.09	0.085	0.02	4.25
ENSG00000172349	IL16	0.11	0.06	0.085	0.02	4.25
ENSG00000217702	RP11-287D1.4	0.06	0.11	0.085	0.02	4.25
ENSG00000247970	RP11-543C4.1	0.11	0.06	0.085	0.02	4.25
ENSG00000259334	LINC00596	0.12	0.05	0.085	0.02	4.25
ENSG00000259641	PCAT29	0.08	0.09	0.085	0.02	4.25
ENSG00000267033	CTD-2562J15.4	0.3	0.04	0.17	0.04	4.25
ENSG00000272707	RP11-534C12.1	0.67	0.69	0.68	0.16	4.25
ENSG00000265112	MIR3153	7.29	10.97	9.13	2.15	4.24651
ENSG00000207009	Y_RNA	0.73	2.24	1.485	0.35	4.24286
ENSG00000154545	MAGED4	1.94	3.32	2.63	0.62	4.24194
ENSG00000259760	RP11-20G13.2	0.62	1.41	1.015	0.24	4.22917
ENSG00000251739	RNU6-1053P	2.14	0.73	1.435	0.34	4.22059
ENSG00000243051	RN7SL269P	0.14	0.45	0.295	0.07	4.21429
ENSG00000140323	DISP2	1.9	2.06	1.98	0.47	4.21277
ENSG00000167723	TRPV3	1.51	0.68	1.095	0.26	4.21154
ENSG00000262265	RP5-867C24.4	0.26	0.16	0.21	0.05	4.2
ENSG00000172789	HOXC5	0.18	0.24	0.21	0.05	4.2
ENSG00000264384	RN7SL431P	0.5	0.17	0.335	0.08	4.1875
ENSG00000260269	CTD-2323K18.1	0.51	1.16	0.835	0.2	4.175
ENSG00000260265	RP11-44F21.5	0.07	0.18	0.125	0.03	4.16667
ENSG00000271344	RP11-274B21.9	0.84	0.74	0.79	0.19	4.15789
ENSG00000253047	SNORA40	1.85	0.64	1.245	0.3	4.15
ENSG00000056291	NPFFR2	1.19	1.71	1.45	0.35	4.14286
ENSG00000276771	HOTAIRM1_2	0.22	0.69	0.455	0.11	4.13636
ENSG00000211714	TRBV7-3	0.57	0.67	0.62	0.15	4.13333
ENSG00000258909	RP11-164C12.2	0.2	0.13	0.165	0.04	4.125
ENSG00000176490	DIRAS1	0.21	0.12	0.165	0.04	4.125
ENSG00000237422	RP11-305L7.3	0.12	0.21	0.165	0.04	4.125
ENSG00000269902	RP6-99M1.3	1.28	1.19	1.235	0.3	4.11667
ENSG00000205835	GMNC	0.36	0.38	0.37	0.09	4.11111
ENSG00000166963	MAP1A	0.38	0.44	0.41	0.1	4.1
ENSG00000275765	RP11-54C4.3	0.63	0.68	0.655	0.16	4.09375
ENSG00000232311	RP1-249I4.2	0.93	0.46	0.695	0.17	4.08824
ENSG00000168243	GNG4	0.19	0.3	0.245	0.06	4.08333
ENSG00000251611	RP11-610P16.1	0.3	0.19	0.245	0.06	4.08333
ENSG00000271420	RP5-1057J7.7	0.6	0.21	0.405	0.1	4.05
ENSG00000204131	NHSL2	0.48	0.73	0.605	0.15	4.03333
ENSG00000259005	RP3-449M8.6	0.62	0.99	0.805	0.2	4.025
ENSG00000277136	Metazoa_SRP	1.41	0.36	0.885	0.22	4.02273
ENSG00000276470	NPPA-AS1_1	1.51	4.28	2.895	0.72	4.02083
ENSG00000197978	GOLGA6L9	4.38	5.02	4.7	1.17	4.01709
ENSG00000204929	AC074391.1	0.14	0.1	0.12	0.03	4
ENSG00000259933	RP11-304L19.1	0.17	0.07	0.12	0.03	4
ENSG00000058404	CAMK2B	0.13	0.11	0.12	0.03	4
ENSG00000081051	AFP	0.05	0.03	0.04	0.01	4
ENSG00000095585	BLNK	0.05	0.03	0.04	0.01	4
ENSG00000101115	SALL4	0.05	0.11	0.08	0.02	4
ENSG00000106809	OGN	0.07	0.01	0.04	0.01	4
ENSG00000124107	SLPI	0.27	0.21	0.24	0.06	4
ENSG00000143107	FNDC7	0.03	0.05	0.04	0.01	4
ENSG00000144619	CNTN4	0.04	0.04	0.04	0.01	4
ENSG00000148482	SLC39A12	0.01	0.07	0.04	0.01	4
ENSG00000151475	SLC25A31	0.05	0.03	0.04	0.01	4
ENSG00000154655	L3MBTL4	0.06	0.1	0.08	0.02	4
ENSG00000156427	FGF18	0.16	0.24	0.2	0.05	4
ENSG00000165462	PHOX2A	0	0.08	0.04	0.01	4
ENSG00000167483	FAM129C	0.05	0.03	0.04	0.01	4
ENSG00000167995	BEST1	0.04	0.04	0.04	0.01	4
ENSG00000168955	TM4SF20	0.05	0.03	0.04	0.01	4
ENSG00000169896	ITGAM	0.03	0.05	0.04	0.01	4
ENSG00000171564	FGB	0.04	0.04	0.04	0.01	4
ENSG00000177553	RP11-56N19.5	0.03	0.05	0.04	0.01	4
ENSG00000178175	ZNF366	0.06	0.1	0.08	0.02	4
ENSG00000182585	EPGN	0.06	0.1	0.08	0.02	4
ENSG00000184068	RP5-821D11.7	0.06	0.02	0.04	0.01	4
ENSG00000185053	SGCZ	0.08	0.08	0.08	0.02	4
ENSG00000185669	SNAI3	0.02	0.06	0.04	0.01	4
ENSG00000188051	TMEM221	0.07	0.01	0.04	0.01	4
ENSG00000205325	AC005863.1	0.04	0.04	0.04	0.01	4
ENSG00000205403	CFI	0.28	0.44	0.36	0.09	4
ENSG00000211644	IGLV1-51	0.18	0.3	0.24	0.06	4
ENSG00000234378	AC098828.2	0.09	0.15	0.12	0.03	4
ENSG00000234572	LINC01800	0.08	0	0.04	0.01	4
ENSG00000234840	LINC01239	0.12	0.12	0.12	0.03	4
ENSG00000235865	GSN-AS1	0.04	0.04	0.04	0.01	4
ENSG00000239791	AC002310.7	0.09	0.07	0.08	0.02	4
ENSG00000241128	OR14A2	0.09	0.07	0.08	0.02	4
ENSG00000250490	LINC02145	0.09	0.07	0.08	0.02	4
ENSG00000260588	RP11-930P14.2	0.12	0.04	0.08	0.02	4
ENSG00000261292	RP11-389G6.3	0.06	0.1	0.08	0.02	4
ENSG00000267077	RP11-127I20.5	0.09	0.15	0.12	0.03	4
ENSG00000269194	AC006942.4	0.12	0.2	0.16	0.04	4
ENSG00000269889	RP11-816J6.3	0.14	0.02	0.08	0.02	4
ENSG00000272568	CTB-113D17.1	0.16	0.24	0.2	0.05	4
ENSG00000273139	XXbac-B444P24.14	0	0.32	0.16	0.04	4
ENSG00000273891	RP11-500G22.5	0.08	0.08	0.08	0.02	4
ENSG00000276744	CTD-2562G15.3	0.06	0.1	0.08	0.02	4
ENSG00000280604	PCBP3-OT1	0.05	0.03	0.04	0.01	4
ENSG00000228124	RP1-122O8.7	0.53	0.5	0.515	0.13	3.96154
ENSG00000229694	LINC00484	0.14	0.89	0.515	0.13	3.96154
ENSG00000005108	THSD7A	0.48	0.47	0.475	0.12	3.95833
ENSG00000196460	RFX8	0.87	0.87	0.87	0.22	3.95455
ENSG00000251379	RP11-484O2.1	3.41	5.13	4.27	1.08	3.9537
ENSG00000114757	PEX5L	0.72	0.46	0.59	0.15	3.93333
ENSG00000244468	RP11-206M11.7	0.87	2.59	1.73	0.44	3.93182
ENSG00000254337	RP11-865I6.2	1.04	0.61	0.825	0.21	3.92857
ENSG00000197457	STMN3	12.88	13.32	13.1	3.34	3.92216
ENSG00000248901	LINC01846	0.43	0.51	0.47	0.12	3.91667
ENSG00000260430	RP11-626G11.4	0.34	0.6	0.47	0.12	3.91667
ENSG00000120738	EGR1	29.76	37.88	33.82	8.67	3.90081
ENSG00000259797	RP11-96D1.3	0.22	0.17	0.195	0.05	3.9
ENSG00000260193	RP11-83N9.5	0.33	0.45	0.39	0.1	3.9
ENSG00000274093	RP11-140H17.2	0.29	0.1	0.195	0.05	3.9
ENSG00000225611	LINC02158	0.58	0.82	0.7	0.18	3.88889
ENSG00000259767	RP11-90B9.2	0.86	0.54	0.7	0.18	3.88889
ENSG00000102195	GPR50	0.1	0.21	0.155	0.04	3.875
ENSG00000226471	CTA-292E10.6	0.45	0.17	0.31	0.08	3.875
ENSG00000258082	RP11-443B7.3	0.05	0.26	0.155	0.04	3.875
ENSG00000259402	RP11-30K9.4	0.13	0.18	0.155	0.04	3.875
ENSG00000230432	AC114803.3	2.19	1.45	1.82	0.47	3.87234
ENSG00000275567	RP11-729I10.3	0.12	0.73	0.425	0.11	3.86364
ENSG00000276411	RP11-494G9.1	0.83	0.48	0.655	0.17	3.85294
ENSG00000099957	P2RX6	0.1	0.13	0.115	0.03	3.83333
ENSG00000226235	LEMD1-AS1	0.1	0.13	0.115	0.03	3.83333
ENSG00000254416	RP11-347E10.1	0.03	0.2	0.115	0.03	3.83333
ENSG00000257551	HLX-AS1	0.04	0.19	0.115	0.03	3.83333
ENSG00000006555	TTC22	0.08	0.15	0.115	0.03	3.83333
ENSG00000172901	LVRN	0.3	0.39	0.345	0.09	3.83333
ENSG00000174460	ZCCHC12	0.26	0.43	0.345	0.09	3.83333
ENSG00000270876	ZNF30-AS1	0.39	0.3	0.345	0.09	3.83333
ENSG00000274023	RP11-732M18.4	0.29	0.4	0.345	0.09	3.83333
ENSG00000187944	C2orf66	1.12	1.25	1.185	0.31	3.82258
ENSG00000251791	SCARNA6	1.2	0.71	0.955	0.25	3.82
ENSG00000268223	ARL14EPL	2.97	3.29	3.13	0.82	3.81707
ENSG00000263955	RN7SL850P	0.61	0.84	0.725	0.19	3.81579
ENSG00000112139	MDGA1	2.21	2.03	2.12	0.56	3.78571
ENSG00000240591	RP11-247I13.11	0.7	0.51	0.605	0.16	3.78125
ENSG00000099822	HCN2	0.5	0.48	0.49	0.13	3.76923
ENSG00000277610	RNVU1-4	0.45	2.79	1.62	0.43	3.76744
ENSG00000101883	RHOXF1	0.1	0.05	0.075	0.02	3.75
ENSG00000101892	ATP1B4	0.07	0.08	0.075	0.02	3.75
ENSG00000112053	SLC26A8	0.14	0.16	0.15	0.04	3.75
ENSG00000147234	FRMPD3	0.1	0.05	0.075	0.02	3.75
ENSG00000156206	CFAP161	0.14	0.01	0.075	0.02	3.75
ENSG00000214842	RAD51AP2	0.07	0.08	0.075	0.02	3.75
ENSG00000246394	RP11-386I8.6	0.19	0.26	0.225	0.06	3.75
ENSG00000248869	RP11-138I17.1	0.08	0.07	0.075	0.02	3.75
ENSG00000253708	RP11-51J9.4	0.07	0.23	0.15	0.04	3.75
ENSG00000260913	LINC01254	0.08	0.07	0.075	0.02	3.75
ENSG00000261028	AC012322.1	0.1	0.05	0.075	0.02	3.75
ENSG00000265254	CTD-2350C19.2	0.17	0.13	0.15	0.04	3.75
ENSG00000130513	GDF15	1.33	2.57	1.95	0.52	3.75
ENSG00000134339	SAA2	0.15	0	0.075	0.02	3.75
ENSG00000182853	VMO1	0.15	0	0.075	0.02	3.75
ENSG00000188993	LRRC66	0.19	0.11	0.15	0.04	3.75
ENSG00000198104	OR2T6	0.02	0.13	0.075	0.02	3.75
ENSG00000236194	AC003104.1	0.19	0.11	0.15	0.04	3.75
ENSG00000245059	RP11-303E16.7	0.11	0.04	0.075	0.02	3.75
ENSG00000254034	RP11-662B19.2	0.3	0	0.15	0.04	3.75
ENSG00000255146	RP11-659P15.1	0.04	0.11	0.075	0.02	3.75
ENSG00000258757	RP11-841O20.2	0.11	0.19	0.15	0.04	3.75
ENSG00000270160	RP11-264E20.2	0.13	0.02	0.075	0.02	3.75
ENSG00000271109	CTC-523E23.11	0.21	0.39	0.3	0.08	3.75
ENSG00000278266	RP11-575F12.3	0.06	0.09	0.075	0.02	3.75
ENSG00000252604	RNU2-44P	0.82	1.13	0.975	0.26	3.75
ENSG00000241149	RP11-561N12.2	0.91	3.28	2.095	0.56	3.74107
ENSG00000184985	SORCS2	0.54	0.88	0.71	0.19	3.73684
ENSG00000244044	RN7SL735P	0.28	0.39	0.335	0.09	3.72222
ENSG00000231212	RP11-111F5.3	8.23	13.76	10.995	2.96	3.71453
ENSG00000239953	RN7SL273P	0.52	0	0.26	0.07	3.71429
ENSG00000231738	TSPAN19	0.45	0.96	0.705	0.19	3.71053
ENSG00000104381	GDAP1	15.65	13.6	14.625	3.95	3.70253
ENSG00000270067	CTC-487M23.5	1.41	1.18	1.295	0.35	3.7
ENSG00000112486	CCR6	0.2	0.17	0.185	0.05	3.7
ENSG00000182901	RGS7	1.83	2.61	2.22	0.6	3.7
ENSG00000232869	TRBV29-1	0.47	0.27	0.37	0.1	3.7
ENSG00000253133	RP11-360L9.4	0.29	0.45	0.37	0.1	3.7
ENSG00000284421	MIR7110	2	1.55	1.775	0.48	3.69792
ENSG00000207034	Y_RNA	1.36	0.56	0.96	0.26	3.69231
ENSG00000116991	SIPA1L2	0.37	0.59	0.48	0.13	3.69231
ENSG00000147408	CSGALNACT1	0.31	0.28	0.295	0.08	3.6875
ENSG00000198879	SFMBT2	0.03	0.56	0.295	0.08	3.6875
ENSG00000069431	ABCC9	1.15	1.21	1.18	0.32	3.6875
ENSG00000253476	RP11-395I14.2	4.33	4.59	4.46	1.21	3.68595
ENSG00000089127	OAS1	5.29	4.57	4.93	1.34	3.6791
ENSG00000201388	SNORA68	0.93	1.27	1.1	0.3	3.66667
ENSG00000225675	LINC01771	0.11	0.11	0.11	0.03	3.66667
ENSG00000229751	RP11-142M10.2	0.07	0.15	0.11	0.03	3.66667
ENSG00000250260	RP11-325L7.2	0.19	0.03	0.11	0.03	3.66667
ENSG00000255375	RP1-65P5.5	0.12	0.1	0.11	0.03	3.66667
ENSG00000273308	RP11-496H1.2	0.31	0.13	0.22	0.06	3.66667
ENSG00000280587	LINC01348	0.12	0.1	0.11	0.03	3.66667
ENSG00000275881	Metazoa_SRP	1.53	1.18	1.355	0.37	3.66216
ENSG00000239122	RNU2-11P	0.54	0.41	0.475	0.13	3.65385
ENSG00000228022	HCG20	0.38	0.35	0.365	0.1	3.65
ENSG00000229245	RP11-542K23.7	0.59	0.87	0.73	0.2	3.65
ENSG00000229989	MIR181A1HG	0.25	0.48	0.365	0.1	3.65
ENSG00000259087	RP11-356O9.2	0.41	0.32	0.365	0.1	3.65
ENSG00000277548	RP11-139H15.6	0.36	0.37	0.365	0.1	3.65
ENSG00000249731	RP11-259O2.3	8.11	9.32	8.715	2.39	3.64644
ENSG00000204792	LINC01291	0.76	0.77	0.765	0.21	3.64286
ENSG00000203395	AC015969.3	0.27	0.24	0.255	0.07	3.64286
ENSG00000248719	RP11-377G16.2	0.18	0.33	0.255	0.07	3.64286
ENSG00000260892	CTD-2026K11.1	0.25	0.26	0.255	0.07	3.64286
ENSG00000179388	EGR3	0.66	0.72	0.69	0.19	3.63158
ENSG00000137460	FHDC1	0.13	0.16	0.145	0.04	3.625
ENSG00000236700	LINC01010	0.1	0.19	0.145	0.04	3.625
ENSG00000131203	IDO1	0.21	0.08	0.145	0.04	3.625
ENSG00000271151	RP11-394I13.2	0.35	0.3	0.325	0.09	3.61111
ENSG00000234199	LINC01191	0.15	0.21	0.18	0.05	3.6
ENSG00000269103	Metazoa_SRP	0.65	0.5	0.575	0.16	3.59375
ENSG00000271991	RP11-79O8.1	0.37	0.42	0.395	0.11	3.59091
ENSG00000273989	RP11-425D17.2	0.33	0.1	0.215	0.06	3.58333
ENSG00000186523	FAM86B1	0.12	0.31	0.215	0.06	3.58333
ENSG00000142661	MYOM3	0.23	0.27	0.25	0.07	3.57143
ENSG00000265791	CTD-2349P21.10	0.32	0.25	0.285	0.08	3.5625
ENSG00000271778	RP11-379F4.8	0.63	0.58	0.605	0.17	3.55882
ENSG00000165078	CPA6	0.82	0.46	0.64	0.18	3.55556
ENSG00000236662	RP11-108L7.4	0.69	0.59	0.64	0.18	3.55556
ENSG00000250061	RP11-541P9.3	0.29	0.35	0.32	0.09	3.55556
ENSG00000196873	CBWD3	0.69	0.66	0.675	0.19	3.55263
ENSG00000107249	GLIS3	0.59	1.17	0.88	0.25	3.52
ENSG00000074317	SNCB	0.04	0.03	0.035	0.01	3.5
ENSG00000077616	NAALAD2	0.26	0.16	0.21	0.06	3.5
ENSG00000110427	KIAA1549L	0.08	0.06	0.07	0.02	3.5
ENSG00000113924	HGD	0.07	0.07	0.07	0.02	3.5
ENSG00000119973	PRLHR	0.04	0.03	0.035	0.01	3.5
ENSG00000135116	HRK	0.05	0.09	0.07	0.02	3.5
ENSG00000145384	FABP2	0.05	0.02	0.035	0.01	3.5
ENSG00000148948	LRRC4C	0.05	0.02	0.035	0.01	3.5
ENSG00000151136	BTBD11	0.03	0.04	0.035	0.01	3.5
ENSG00000151650	VENTX	0.1	0.04	0.07	0.02	3.5
ENSG00000151834	GABRA2	0.05	0.02	0.035	0.01	3.5
ENSG00000155980	KIF5A	0.04	0.03	0.035	0.01	3.5
ENSG00000164626	KCNK5	0.03	0.04	0.035	0.01	3.5
ENSG00000168427	KLHL30	0.06	0.08	0.07	0.02	3.5
ENSG00000169064	ZBBX	0.03	0.04	0.035	0.01	3.5
ENSG00000175147	TMEM51-AS1	0.05	0.02	0.035	0.01	3.5
ENSG00000176040	TMPRSS7	0.07	0.07	0.07	0.02	3.5
ENSG00000177614	PGBD5	0.07	0.07	0.07	0.02	3.5
ENSG00000179059	ZFP42	0.19	0.09	0.14	0.04	3.5
ENSG00000179253	RP11-429E11.3	0.03	0.04	0.035	0.01	3.5
ENSG00000182950	ODF3L1	0.11	0.03	0.07	0.02	3.5
ENSG00000183833	MAATS1	0.04	0.03	0.035	0.01	3.5
ENSG00000187959	CPSF4L	0.02	0.05	0.035	0.01	3.5
ENSG00000196468	FGF16	0.05	0.02	0.035	0.01	3.5
ENSG00000197921	HES5	0.07	0	0.035	0.01	3.5
ENSG00000206028	CTA-373H7.7	0.04	0.03	0.035	0.01	3.5
ENSG00000222035	AC079354.3	0.04	0.03	0.035	0.01	3.5
ENSG00000223776	LGALS8-AS1	0.03	0.04	0.035	0.01	3.5
ENSG00000229649	RP11-107I14.4	0.07	0.14	0.105	0.03	3.5
ENSG00000230366	DSCR9	0.06	0.08	0.07	0.02	3.5
ENSG00000231172	AC007099.1	0.07	0.07	0.07	0.02	3.5
ENSG00000235532	LINC00402	0.09	0.05	0.07	0.02	3.5
ENSG00000235881	AC114776.3	0.03	0.04	0.035	0.01	3.5
ENSG00000237208	RP11-13E5.2	0.2	0.08	0.14	0.04	3.5
ENSG00000246863	RP11-325N19.3	0.05	0.02	0.035	0.01	3.5
ENSG00000248730	EGFLAM-AS4	0.03	0.04	0.035	0.01	3.5
ENSG00000250803	CTC-441N14.4	0.04	0.03	0.035	0.01	3.5
ENSG00000253372	RP11-44N11.1	0.08	0.2	0.14	0.04	3.5
ENSG00000254440	PBOV1	0.03	0.04	0.035	0.01	3.5
ENSG00000254973	RP11-429J17.7	0.09	0.05	0.07	0.02	3.5
ENSG00000257985	RP1-228P16.4	0.03	0.04	0.035	0.01	3.5
ENSG00000259336	RP11-323I15.5	0	0.07	0.035	0.01	3.5
ENSG00000260585	RP13-192B19.2	0.02	0.05	0.035	0.01	3.5
ENSG00000269814	CTC-273B12.10	0.14	0.14	0.14	0.04	3.5
ENSG00000280719	PCAT5	0.08	0.06	0.07	0.02	3.5
ENSG00000282381	RP11-328P23.4	0.14	0.07	0.105	0.03	3.5
ENSG00000151025	GPR158	0.18	0.24	0.21	0.06	3.5
ENSG00000203321	C9orf41-AS1	0.12	0.09	0.105	0.03	3.5
ENSG00000223597	LINC02142	0.54	0.37	0.455	0.13	3.5
ENSG00000253206	RP11-738G5.2	0.12	0.3	0.21	0.06	3.5
ENSG00000253331	CTC-207P7.1	0.06	0.15	0.105	0.03	3.5
ENSG00000277550	RP5-1057B20.3	0.15	0.06	0.105	0.03	3.5
ENSG00000143171	RXRG	0.06	0.01	0.035	0.01	3.5
ENSG00000153822	KCNJ16	0.06	0.01	0.035	0.01	3.5
ENSG00000225335	XXbac-B476C20.9	0.24	0.25	0.245	0.07	3.5
ENSG00000235387	SPAAR	0.06	0.01	0.035	0.01	3.5
ENSG00000251258	RFPL4B	0.01	0.06	0.035	0.01	3.5
ENSG00000258355	RP11-651L5.2	0.35	0.14	0.245	0.07	3.5
ENSG00000256973	RP11-359J14.2	2.39	3.24	2.815	0.81	3.47531
ENSG00000149346	SLX4IP	0.27	0.63	0.45	0.13	3.46154
ENSG00000256299	RP11-989F5.3	0.62	0.28	0.45	0.13	3.46154
ENSG00000130988	RGN	1.23	1.33	1.28	0.37	3.45946
ENSG00000188916	FAM196A	0.37	0.39	0.38	0.11	3.45455
ENSG00000238197	PAXBP1-AS1	0.26	0.5	0.38	0.11	3.45455
ENSG00000223626	LINC01044	0.58	0.11	0.345	0.1	3.45
ENSG00000249196	RP11-669N7.2	0.42	0.82	0.62	0.18	3.44444
ENSG00000252311	RNU1-103P	1.22	2.01	1.615	0.47	3.43617
ENSG00000277199	LINC01632	0.46	0.91	0.685	0.2	3.425
ENSG00000277250	Metazoa_SRP	0.62	0.75	0.685	0.2	3.425
ENSG00000214432	AC068831.10	0.75	0.14	0.445	0.13	3.42308
ENSG00000231389	HLA-DPA1	0.29	0.12	0.205	0.06	3.41667
ENSG00000280511	RP11-35J1.2	0.93	1.18	1.055	0.31	3.40323
ENSG00000229848	RP13-766D20.2	0.18	0.16	0.17	0.05	3.4
ENSG00000273771	RP11-236L14.2	0.22	0.12	0.17	0.05	3.4
ENSG00000251364	CTD-2516F10.2	0.4	0.21	0.305	0.09	3.38889
ENSG00000159261	CLDN14	0.46	0.42	0.44	0.13	3.38462
ENSG00000253948	RP11-410L14.2	1.79	3.28	2.535	0.75	3.38
ENSG00000259445	RP11-276M12.1	0.49	0.32	0.405	0.12	3.375
ENSG00000197506	SLC28A3	0.16	0.11	0.135	0.04	3.375
ENSG00000229937	PRPS1L1	0.18	0.09	0.135	0.04	3.375
ENSG00000235513	RP4-756G23.5	0.2	0.07	0.135	0.04	3.375
ENSG00000241593	RP11-520D19.2	0.27	0	0.135	0.04	3.375
ENSG00000255850	TMEM5-AS1	0.11	0.16	0.135	0.04	3.375
ENSG00000257809	RP11-603J24.14	0.19	0.08	0.135	0.04	3.375
ENSG00000258940	RP11-407N17.5	0.04	0.23	0.135	0.04	3.375
ENSG00000270071	AP001172.2	0.23	0.04	0.135	0.04	3.375
ENSG00000259240	RP11-108K3.1	0.31	0.16	0.235	0.07	3.35714
ENSG00000265943	RP11-739L10.1	0.32	0.15	0.235	0.07	3.35714
ENSG00000187479	C11orf96	0.5	0.64	0.57	0.17	3.35294
ENSG00000281508	CDR1-AS	0.44	0.23	0.335	0.1	3.35
ENSG00000183307	CECR6	0.3	0.37	0.335	0.1	3.35
ENSG00000236423	LINC01134	0.26	0.41	0.335	0.1	3.35
ENSG00000270462	RP11-342K6.3	0.41	0.26	0.335	0.1	3.35
ENSG00000071242	RPS6KA2	2.79	3.63	3.21	0.96	3.34375
ENSG00000158458	NRG2	0.62	0.45	0.535	0.16	3.34375
ENSG00000010379	SLC6A13	0.1	0.1	0.1	0.03	3.33333
ENSG00000153294	ADGRF4	0.07	0.13	0.1	0.03	3.33333
ENSG00000163810	TGM4	0.07	0.13	0.1	0.03	3.33333
ENSG00000167208	SNX20	0.05	0.15	0.1	0.03	3.33333
ENSG00000245870	LINC00682	0.13	0.07	0.1	0.03	3.33333
ENSG00000249096	RP11-290F5.1	0.08	0.12	0.1	0.03	3.33333
ENSG00000138316	ADAMTS14	0.91	0.49	0.7	0.21	3.33333
ENSG00000120279	MYCT1	3.19	1.53	2.36	0.71	3.32394
ENSG00000080031	PTPRH	2.97	2.08	2.525	0.76	3.32237
ENSG00000255337	RP11-315O6.1	0.46	0.47	0.465	0.14	3.32143
ENSG00000176771	NCKAP5	0.24	0.29	0.265	0.08	3.3125
ENSG00000253901	RP11-122C21.1	0.24	0.29	0.265	0.08	3.3125
ENSG00000184613	NELL2	1.08	0.84	0.96	0.29	3.31034
ENSG00000256128	LINC00944	0.22	0.64	0.43	0.13	3.30769
ENSG00000257515	RP11-498M15.1	0.21	0.65	0.43	0.13	3.30769
ENSG00000083097	DOPEY1	3.57	4.83	4.2	1.27	3.30709
ENSG00000064886	CHI3L2	0.19	0.14	0.165	0.05	3.3
ENSG00000171643	S100Z	0.17	0.16	0.165	0.05	3.3
ENSG00000172061	LRRC15	0.14	0.19	0.165	0.05	3.3
ENSG00000268565	AC005339.2	0.27	0.06	0.165	0.05	3.3
ENSG00000226355	RP11-65J3.2	0.3	0.36	0.33	0.1	3.3
ENSG00000131398	KCNC3	0.54	0.58	0.56	0.17	3.29412
ENSG00000259618	RP11-562A8.5	0.15	0.31	0.23	0.07	3.28571
ENSG00000231868	RP1-202O8.2	0.29	0.3	0.295	0.09	3.27778
ENSG00000162415	ZSWIM5	0.38	0.34	0.36	0.11	3.27273
ENSG00000134317	GRHL1	0.27	0.58	0.425	0.13	3.26923
ENSG00000234684	SDCBP2-AS1	0.95	0.88	0.915	0.28	3.26786
ENSG00000183570	PCBP3	0.64	0.73	0.685	0.21	3.2619
ENSG00000164683	HEY1	4.96	7.16	6.06	1.86	3.25806
ENSG00000177788	RP5-1061H20.4	0.18	0.21	0.195	0.06	3.25
ENSG00000227516	RP5-973N23.4	0.19	0.2	0.195	0.06	3.25
ENSG00000267719	LINC02078	0.14	0.25	0.195	0.06	3.25
ENSG00000269694	AC005197.2	0.32	0.07	0.195	0.06	3.25
ENSG00000074706	IPCEF1	0.31	0.21	0.26	0.08	3.25
ENSG00000127954	STEAP4	0.07	0.06	0.065	0.02	3.25
ENSG00000137090	DMRT1	0.05	0.08	0.065	0.02	3.25
ENSG00000146469	VIP	0.31	0.21	0.26	0.08	3.25
ENSG00000157388	CACNA1D	0.06	0.07	0.065	0.02	3.25
ENSG00000160349	LCN1	0.31	0.34	0.325	0.1	3.25
ENSG00000162643	WDR63	0.05	0.08	0.065	0.02	3.25
ENSG00000163072	NOSTRIN	0.06	0.07	0.065	0.02	3.25
ENSG00000164287	CDC20B	0.11	0.02	0.065	0.02	3.25
ENSG00000167741	GGT6	0.04	0.09	0.065	0.02	3.25
ENSG00000177174	OR14C36	0.02	0.11	0.065	0.02	3.25
ENSG00000188959	C9orf152	0.03	0.1	0.065	0.02	3.25
ENSG00000204420	MPIG6B	0.03	0.1	0.065	0.02	3.25
ENSG00000223390	RP11-91A18.4	0	0.13	0.065	0.02	3.25
ENSG00000224017	LINC01449	0.05	0.08	0.065	0.02	3.25
ENSG00000224746	AC015987.1	0	0.13	0.065	0.02	3.25
ENSG00000232504	ST3GAL5-AS1	0.08	0.05	0.065	0.02	3.25
ENSG00000233589	RP4-694A7.2	0.2	0.06	0.13	0.04	3.25
ENSG00000251586	TET2-AS1	0.13	0.13	0.13	0.04	3.25
ENSG00000254226	LINC01933	0.05	0.08	0.065	0.02	3.25
ENSG00000261602	CTD-2033A16.1	0.17	0.09	0.13	0.04	3.25
ENSG00000225226	LINC01795	1.04	0.84	0.94	0.29	3.24138
ENSG00000198814	GK	2.43	1.52	1.975	0.61	3.2377
ENSG00000253522	MIR3142HG	10.01	7.97	8.99	2.78	3.23381
ENSG00000134245	WNT2B	2.53	2.32	2.425	0.75	3.23333
ENSG00000231193	RP11-462B18.2	0.22	0.23	0.225	0.07	3.21429
ENSG00000187904	AC097382.5	0.93	0.48	0.705	0.22	3.20455
ENSG00000255650	FAM222A-AS1	0.47	0.49	0.48	0.15	3.2
ENSG00000204147	ASAH2B	0.56	0.78	0.67	0.21	3.19048
ENSG00000213145	CRIP1	0.27	0.24	0.255	0.08	3.1875
ENSG00000244675	AC108676.1	0.25	0.26	0.255	0.08	3.1875
ENSG00000261441	RP11-217B1.2	0.53	0.68	0.605	0.19	3.18421
ENSG00000277958	Metazoa_SRP	0.85	2.27	1.56	0.49	3.18367
ENSG00000273213	RP5-998N21.10	4.98	3.67	4.325	1.36	3.18015
ENSG00000184792	OSBP2	4.46	4.06	4.26	1.34	3.1791
ENSG00000119698	PPP4R4	0.48	0.41	0.445	0.14	3.17857
ENSG00000199846	RNU1-72P	2.49	1.83	2.16	0.68	3.17647
ENSG00000278526	ST7-OT3_2	0.84	0.43	0.635	0.2	3.175
ENSG00000104848	KCNA7	0.11	0.08	0.095	0.03	3.16667
ENSG00000151962	RBM46	0.1	0.09	0.095	0.03	3.16667
ENSG00000164082	GRM2	0.12	0.07	0.095	0.03	3.16667
ENSG00000237693	IRGM	0.14	0.24	0.19	0.06	3.16667
ENSG00000247950	SEC24B-AS1	0.11	0.08	0.095	0.03	3.16667
ENSG00000255545	RP11-627G23.1	0.12	0.07	0.095	0.03	3.16667
ENSG00000258845	RP11-945F5.1	0	0.19	0.095	0.03	3.16667
ENSG00000240322	RN7SL481P	0.47	0.1	0.285	0.09	3.16667
ENSG00000238741	SCARNA7	0.66	0.54	0.6	0.19	3.15789
ENSG00000196096	AC079610.2	0.64	0.62	0.63	0.2	3.15
ENSG00000207313	SNORA2B	1.12	0.58	0.85	0.27	3.14815
ENSG00000064989	CALCRL	0.18	0.26	0.22	0.07	3.14286
ENSG00000255524	NPIPB8	0.44	0	0.22	0.07	3.14286
ENSG00000177181	RIMKLA	0.42	0.27	0.345	0.11	3.13636
ENSG00000283969	MIR6838	15.87	0	7.935	2.53	3.13636
ENSG00000132026	RTBDN	1.15	1.42	1.285	0.41	3.13415
ENSG00000105784	RUNDC3B	0.22	0.28	0.25	0.08	3.125
ENSG00000110169	HPX	0.17	0.08	0.125	0.04	3.125
ENSG00000172572	PDE3A	0.1	0.15	0.125	0.04	3.125
ENSG00000249275	RP11-364P22.2	0.47	0.28	0.375	0.12	3.125
ENSG00000274859	RP11-136L23.2	0.4	0.41	0.405	0.13	3.11538
ENSG00000115009	CCL20	0.8	1.69	1.245	0.4	3.1125
ENSG00000272109	CTD-2260A17.3	0.38	0.49	0.435	0.14	3.10714
ENSG00000203930	LINC00632	3.43	2.41	2.92	0.94	3.10638
ENSG00000160883	HK3	0.28	0.03	0.155	0.05	3.1
ENSG00000196503	ARL9	0.17	0.14	0.155	0.05	3.1
ENSG00000261573	RP11-553K8.5	0	0.31	0.155	0.05	3.1
ENSG00000237643	RP11-462G2.1	1.36	0.56	0.96	0.31	3.09677
ENSG00000206754	SNORD101	12.34	15.09	13.715	4.43	3.09594
ENSG00000221826	PSG3	0.54	0.45	0.495	0.16	3.09375
ENSG00000188848	BEND4	0.05	0.32	0.185	0.06	3.08333
ENSG00000223811	RP11-437J19.1	0.49	0.25	0.37	0.12	3.08333
ENSG00000254254	RP11-17A4.2	0.54	0.57	0.555	0.18	3.08333
ENSG00000120049	KCNIP2	1.57	1.2	1.385	0.45	3.07778
ENSG00000121318	TAS2R10	0.21	0.59	0.4	0.13	3.07692
ENSG00000171714	ANO5	0.63	0.66	0.645	0.21	3.07143
ENSG00000243224	RP5-1157M23.2	0.61	0.68	0.645	0.21	3.07143
ENSG00000167994	RAB3IL1	0.31	0.61	0.46	0.15	3.06667
ENSG00000183018	SPNS2	32.07	31.47	31.77	10.37	3.06365
ENSG00000149507	OOSP2	0.39	0.1	0.245	0.08	3.0625
ENSG00000179869	ABCA13	0.16	0.33	0.245	0.08	3.0625
ENSG00000232485	AC098820.3	0.24	0.25	0.245	0.08	3.0625
ENSG00000239908	RN7SL75P	0.24	0.25	0.245	0.08	3.0625
ENSG00000254057	RP3-388N13.3	0.24	0.25	0.245	0.08	3.0625
ENSG00000258028	RP11-148E17.1	0.27	0.22	0.245	0.08	3.0625
ENSG00000259039	RP11-409I10.2	0.17	0.32	0.245	0.08	3.0625
ENSG00000261216	RP11-166B2.5	0.41	0.08	0.245	0.08	3.0625
ENSG00000238363	SNORA13	2.64	2.5	2.57	0.84	3.05952
ENSG00000214305	Metazoa_SRP	3.87	6.21	5.04	1.65	3.05455
ENSG00000169258	GPRIN1	10.6	8.09	9.345	3.06	3.05392
ENSG00000101188	NTSR1	0.62	0.6	0.61	0.2	3.05
ENSG00000163694	RBM47	0.29	0.32	0.305	0.1	3.05
ENSG00000276846	CTD-3220F14.3	0.18	0.43	0.305	0.1	3.05
ENSG00000277901	RP5-851M4.1	0.35	0.26	0.305	0.1	3.05
ENSG00000280634	THRIL	0.3	0.31	0.305	0.1	3.05
ENSG00000241064	RN7SL110P	2.56	2.56	2.56	0.84	3.04762
ENSG00000239040	Y_RNA	4.8	3.18	3.99	1.31	3.0458
ENSG00000276410	HIST1H2BB	0.73	0.85	0.79	0.26	3.03846
ENSG00000214954	LRRC69	0.62	1.02	0.82	0.27	3.03704
ENSG00000188487	INSC	2.47	1.78	2.125	0.7	3.03571
ENSG00000260572	RP11-16N11.2	0.39	0.46	0.425	0.14	3.03571
ENSG00000175352	NRIP3	0.9	0.86	0.88	0.29	3.03448
ENSG00000261317	RP11-566K11.5	0.47	0.44	0.455	0.15	3.03333
ENSG00000187229	RP11-161I2.1	0.5	1.07	0.785	0.26	3.01923
ENSG00000139438	FAM222A	0.78	1.03	0.905	0.3	3.01667
ENSG00000229299	RP4-583P15.10	2.45	2.43	2.44	0.81	3.01235
ENSG00000185973	TMLHE	2	1.13	1.565	0.52	3.00962
ENSG00000251893	SNORA70	1.83	2.68	2.255	0.75	3.00667
ENSG00000164532	TBX20	0.34	0.26	0.3	0.1	3
ENSG00000224790	AP000704.5	0.34	0.2	0.27	0.09	3
ENSG00000226149	RP1-69D17.4	0.6	0.48	0.54	0.18	3
ENSG00000231842	RP11-527F13.1	0.28	0.32	0.3	0.1	3
ENSG00000234235	BOK-AS1	0.41	0.13	0.27	0.09	3
ENSG00000248176	RP11-472K22.1	0.44	0.1	0.27	0.09	3
ENSG00000009790	TRAF3IP3	0.11	0.01	0.06	0.02	3
ENSG00000012504	NR1H4	0.03	0.03	0.03	0.01	3
ENSG00000013293	SLC7A14	0.07	0.05	0.06	0.02	3
ENSG00000063438	AHRR	0.13	0.11	0.12	0.04	3
ENSG00000070193	FGF10	0.03	0.03	0.03	0.01	3
ENSG00000071909	MYO3B	0.05	0.01	0.03	0.01	3
ENSG00000073067	CYP2W1	0.03	0.09	0.06	0.02	3
ENSG00000082293	COL19A1	0.09	0.09	0.09	0.03	3
ENSG00000099866	MADCAM1	0.03	0.03	0.03	0.01	3
ENSG00000100298	APOBEC3H	0.02	0.1	0.06	0.02	3
ENSG00000100314	CABP7	0.04	0.02	0.03	0.01	3
ENSG00000104894	CD37	0.3	0.06	0.18	0.06	3
ENSG00000105392	CRX	0.08	0.04	0.06	0.02	3
ENSG00000105472	CLEC11A	0	0.06	0.03	0.01	3
ENSG00000105997	HOXA3	0.02	0.04	0.03	0.01	3
ENSG00000106013	ANKRD7	0	0.06	0.03	0.01	3
ENSG00000109758	HGFAC	0.1	0.08	0.09	0.03	3
ENSG00000111913	FAM65B	0.05	0.01	0.03	0.01	3
ENSG00000116031	CD207	0.02	0.04	0.03	0.01	3
ENSG00000116183	PAPPA2	0.02	0.04	0.03	0.01	3
ENSG00000121101	TEX14	0.29	0.19	0.24	0.08	3
ENSG00000131914	LIN28A	0.09	0.09	0.09	0.03	3
ENSG00000137251	TINAG	0.03	0.03	0.03	0.01	3
ENSG00000140835	CHST4	0	0.12	0.06	0.02	3
ENSG00000142694	EVA1B	0.04	0.08	0.06	0.02	3
ENSG00000143469	SYT14	0.02	0.04	0.03	0.01	3
ENSG00000146070	PLA2G7	0.05	0.01	0.03	0.01	3
ENSG00000153303	FRMD1	0.05	0.01	0.03	0.01	3
ENSG00000154485	MMP21	0.14	0.1	0.12	0.04	3
ENSG00000155269	GPR78	0.05	0.01	0.03	0.01	3
ENSG00000158113	LRRC43	0.02	0.04	0.03	0.01	3
ENSG00000159871	LYPD5	0.06	0.06	0.06	0.02	3
ENSG00000161905	ALOX15	0.03	0.03	0.03	0.01	3
ENSG00000162618	ADGRL4	0.02	0.1	0.06	0.02	3
ENSG00000163121	NEURL3	0.14	0.22	0.18	0.06	3
ENSG00000163793	DNAJC5G	0.02	0.04	0.03	0.01	3
ENSG00000164304	CAGE1	0.04	0.08	0.06	0.02	3
ENSG00000164794	KCNV1	0.02	0.04	0.03	0.01	3
ENSG00000166268	MYRFL	0	0.24	0.12	0.04	3
ENSG00000166402	TUB	0.08	0.1	0.09	0.03	3
ENSG00000166866	MYO1A	0.03	0.03	0.03	0.01	3
ENSG00000170091	HMP19	0.02	0.04	0.03	0.01	3
ENSG00000171747	LGALS4	0.16	0.26	0.21	0.07	3
ENSG00000183454	GRIN2A	0.04	0.02	0.03	0.01	3
ENSG00000187556	NANOS3	0.07	0.11	0.09	0.03	3
ENSG00000196361	ELAVL3	0.03	0.03	0.03	0.01	3
ENSG00000197993	KEL	0.01	0.05	0.03	0.01	3
ENSG00000198885	ITPRIPL1	0.04	0.02	0.03	0.01	3
ENSG00000204118	NAP1L6	0.06	0.06	0.06	0.02	3
ENSG00000204161	C10orf128	0.04	0.02	0.03	0.01	3
ENSG00000204252	HLA-DOA	0.08	0.1	0.09	0.03	3
ENSG00000206262	FOXL2NB	0.07	0.05	0.06	0.02	3
ENSG00000212722	KRTAP4-9	0.05	0.19	0.12	0.04	3
ENSG00000213904	LIPE-AS1	0.05	0.07	0.06	0.02	3
ENSG00000225860	LINC02072	0.03	0.03	0.03	0.01	3
ENSG00000227617	CERS6-AS1	0.1	0.08	0.09	0.03	3
ENSG00000228422	LINC00687	0.18	0	0.09	0.03	3
ENSG00000230542	LINC00102	0.03	0.03	0.03	0.01	3
ENSG00000230709	AC104024.1	0.09	0.03	0.06	0.02	3
ENSG00000231871	IPO9-AS1	0.05	0.19	0.12	0.04	3
ENSG00000232536	RP11-74C1.4	0.58	0.32	0.45	0.15	3
ENSG00000233009	NALCN-AS1	0.05	0.07	0.06	0.02	3
ENSG00000233834	AC005083.1	0.12	0.06	0.09	0.03	3
ENSG00000235568	NFAM1	0.04	0.02	0.03	0.01	3
ENSG00000236780	LINC01829	0.02	0.04	0.03	0.01	3
ENSG00000237280	RP11-96C23.9	0.09	0.09	0.09	0.03	3
ENSG00000248461	LINC02119	0.01	0.05	0.03	0.01	3
ENSG00000255020	AF131216.5	0.06	0.06	0.06	0.02	3
ENSG00000255082	GRM5-AS1	0.04	0.02	0.03	0.01	3
ENSG00000255621	RP11-377D9.3	0.06	0.06	0.06	0.02	3
ENSG00000257335	MGAM	0.06	0.06	0.06	0.02	3
ENSG00000258804	LINC01148	0.09	0.03	0.06	0.02	3
ENSG00000258809	CTD-2555O16.1	0.18	0	0.09	0.03	3
ENSG00000259119	RP11-1127D7.1	0.03	0.03	0.03	0.01	3
ENSG00000260352	CTD-2288F12.1	0.05	0.19	0.12	0.04	3
ENSG00000260838	RP11-531A24.3	0.07	0.05	0.06	0.02	3
ENSG00000261568	RP11-524C21.2	0.05	0.01	0.03	0.01	3
ENSG00000261742	LINC00922	0.11	0.07	0.09	0.03	3
ENSG00000263307	RP11-166B2.8	0.11	0.07	0.09	0.03	3
ENSG00000263711	RP11-169F17.1	0.08	0.16	0.12	0.04	3
ENSG00000264235	RP13-270P17.1	0	0.12	0.06	0.02	3
ENSG00000266714	MYO15B	0.14	0.1	0.12	0.04	3
ENSG00000267429	AC006116.15	0.02	0.1	0.06	0.02	3
ENSG00000269113	TRABD2B	0.05	0.07	0.06	0.02	3
ENSG00000269235	ZNF350-AS1	0.12	0.06	0.09	0.03	3
ENSG00000272457	RP11-1070A24.2	0.41	0.55	0.48	0.16	3
ENSG00000275484	CTC-1337H24.4	0.08	0.16	0.12	0.04	3
ENSG00000284534	RP11-340I6.13	0.33	0.45	0.39	0.13	3
ENSG00000106436	MYL10	0.35	0.25	0.3	0.1	3
ENSG00000106772	PRUNE2	0.22	0.08	0.15	0.05	3
ENSG00000125787	GNRH2	0.25	0.05	0.15	0.05	3
ENSG00000139329	LUM	0.05	0.25	0.15	0.05	3
ENSG00000240573	RP11-354H21.2	0.11	0.31	0.21	0.07	3
ENSG00000265043	RP11-728E14.3	0.24	0.18	0.21	0.07	3
ENSG00000273769	LCA10	0.11	0.19	0.15	0.05	3
ENSG00000278109	Metazoa_SRP	0.27	2.07	1.17	0.39	3
ENSG00000281404	LINC01176	1.08	0.83	0.955	0.32	2.98438
ENSG00000270265	RP11-731D1.4	0.82	0.85	0.835	0.28	2.98214
ENSG00000091656	ZFHX4	1.38	0.88	1.13	0.38	2.97368
ENSG00000255176	AP002954.3	0.49	0.58	0.535	0.18	2.97222
ENSG00000277693	AP003900.6	0.19	0.76	0.475	0.16	2.96875
ENSG00000235244	DANT2	0.56	0.33	0.445	0.15	2.96667
ENSG00000260693	AC026150.8	0.22	0.67	0.445	0.15	2.96667
ENSG00000119547	ONECUT2	0.8	0.92	0.86	0.29	2.96552
ENSG00000229401	MIR5689HG	0.53	0.3	0.415	0.14	2.96429
ENSG00000197632	SERPINB2	0.47	0.36	0.415	0.14	2.96429
ENSG00000258649	CTD-2142D14.1	1	1.37	1.185	0.4	2.9625
ENSG00000261490	RP11-448G15.3	0.89	1.3	1.095	0.37	2.95946
ENSG00000197599	CCDC154	0.32	0.27	0.295	0.1	2.95
ENSG00000262039	RP11-81K2.1	0.55	0.63	0.59	0.2	2.95
ENSG00000250155	CTD-2353F22.1	0.38	0.21	0.295	0.1	2.95
ENSG00000273674	CTD-2378E12.1	0.26	0.27	0.265	0.09	2.94444
ENSG00000275557	RP11-353N4.6	0.38	0.15	0.265	0.09	2.94444
ENSG00000263412	RP5-890E16.2	0.38	1.09	0.735	0.25	2.94
ENSG00000269888	RP11-3P17.5	37.02	171.53	104.275	35.48	2.93898
ENSG00000233351	RP1-69D17.3	0.38	0.56	0.47	0.16	2.9375
ENSG00000228623	ZNF883	0.32	0.15	0.235	0.08	2.9375
ENSG00000233246	RP11-415J8.5	0.21	0.26	0.235	0.08	2.9375
ENSG00000124089	MC3R	1.09	1.2	1.145	0.39	2.9359
ENSG00000196263	ZNF471	0.16	0.25	0.205	0.07	2.92857
ENSG00000265010	RP11-661C3.2	0.27	0.14	0.205	0.07	2.92857
ENSG00000269570	CMB9-55A18.1	0.23	0.18	0.205	0.07	2.92857
ENSG00000271551	RP11-230C9.2	0.23	0.53	0.38	0.13	2.92308
ENSG00000271734	RP1-111B22.3	0.44	0.32	0.38	0.13	2.92308
ENSG00000272361	GS1-166A23.2	0.24	0.87	0.555	0.19	2.92105
ENSG00000174015	SPERT	0.18	0.17	0.175	0.06	2.91667
ENSG00000246451	RP11-894P9.1	0.15	0.2	0.175	0.06	2.91667
ENSG00000249346	LINC01016	0.19	0.16	0.175	0.06	2.91667
ENSG00000270020	RP11-463O9.9	0.18	0.17	0.175	0.06	2.91667
ENSG00000187621	TCL6	0.48	0.8	0.64	0.22	2.90909
ENSG00000124882	EREG	4.16	5.25	4.705	1.62	2.90432
ENSG00000271941	RP11-188P20.3	2.2	2.27	2.235	0.77	2.9026
ENSG00000043462	LCP2	0.2	0.09	0.145	0.05	2.9
ENSG00000244623	OR2AE1	0.14	0.15	0.145	0.05	2.9
ENSG00000267498	CTB-32O4.2	0.17	0.12	0.145	0.05	2.9
ENSG00000280195	XX-FW83563B9.5	0.12	0.17	0.145	0.05	2.9
ENSG00000271855	RP11-214N9.1	0.36	0.51	0.435	0.15	2.9
ENSG00000278570	NR2E3	0.52	0.35	0.435	0.15	2.9
ENSG00000228980	LINC01205	0.08	0.21	0.145	0.05	2.9
ENSG00000186469	GNG2	0.3	0.51	0.405	0.14	2.89286
ENSG00000146197	SCUBE3	7.59	5.07	6.33	2.19	2.89041
ENSG00000248479	RP11-807H7.2	0.99	0.51	0.75	0.26	2.88462
ENSG00000123095	BHLHE41	3.08	4.92	4	1.39	2.8777
ENSG00000101307	SIRPB1	0.14	0.09	0.115	0.04	2.875
ENSG00000138798	EGF	0.07	0.16	0.115	0.04	2.875
ENSG00000169906	S100G	0.14	0.09	0.115	0.04	2.875
ENSG00000215196	AC091878.1	0.09	0.14	0.115	0.04	2.875
ENSG00000228222	AC074363.1	0.09	0.14	0.115	0.04	2.875
ENSG00000233797	UFL1-AS1	0.19	0.04	0.115	0.04	2.875
ENSG00000259498	RP11-244F12.3	0.1	0.13	0.115	0.04	2.875
ENSG00000272699	RP11-145M9.5	0.33	0.13	0.23	0.08	2.875
ENSG00000272958	CMP21-97G8.2	0.14	0.09	0.115	0.04	2.875
ENSG00000273584	RP11-861L17.4	0.04	0.19	0.115	0.04	2.875
ENSG00000278921	EPB41L4A-AS2	0.07	0.16	0.115	0.04	2.875
ENSG00000227543	SPAG5-AS1	0.11	0.12	0.115	0.04	2.875
ENSG00000266958	AC006126.3	0.15	0.08	0.115	0.04	2.875
ENSG00000271649	LINC00904	0.18	0.05	0.115	0.04	2.875
ENSG00000274898	AC001226.7	0.15	0.08	0.115	0.04	2.875
ENSG00000277368	RP11-380N8.7	0.18	0.05	0.115	0.04	2.875
ENSG00000143226	FCGR2A	0.58	0.74	0.66	0.23	2.86957
ENSG00000231274	SBK3	0.42	0.44	0.43	0.15	2.86667
ENSG00000278151	FAM13A-AS1_1	2.38	0.54	1.46	0.51	2.86275
ENSG00000233912	AC026202.3	0.25	0.15	0.2	0.07	2.85714
ENSG00000253182	RP11-486M23.2	0.25	0.15	0.2	0.07	2.85714
ENSG00000281183	NPTN-IT1	4.33	3.67	4	1.4	2.85714
ENSG00000273473	LL09NC01-139C3.1	0.11	0.29	0.2	0.07	2.85714
ENSG00000150627	WDR17	2.55	2.64	2.595	0.91	2.85165
ENSG00000186907	RTN4RL2	1.98	1.44	1.71	0.6	2.85
ENSG00000175003	SLC22A1	0.37	0.37	0.37	0.13	2.84615
ENSG00000249456	RP11-298J20.4	0.73	1.66	1.195	0.42	2.84524
ENSG00000164620	RELL2	2.27	1.94	2.105	0.74	2.84459
ENSG00000239887	C1orf226	4.05	3.85	3.95	1.39	2.84173
ENSG00000138669	PRKG2	0.74	0.68	0.71	0.25	2.84
ENSG00000152128	TMEM163	2.1	5.62	3.86	1.36	2.83824
ENSG00000258765	RP11-692C24.2	8.21	7.66	7.935	2.8	2.83393
ENSG00000161328	LRRC56	0.27	0.24	0.255	0.09	2.83333
ENSG00000172995	ARPP21	0.07	0.1	0.085	0.03	2.83333
ENSG00000279623	RP11-399C16.3	0.03	0.14	0.085	0.03	2.83333
ENSG00000118849	RARRES1	0.09	0.08	0.085	0.03	2.83333
ENSG00000132840	BHMT2	0.06	0.11	0.085	0.03	2.83333
ENSG00000140986	RPL3L	0.11	0.06	0.085	0.03	2.83333
ENSG00000160460	SPTBN4	0.11	0.06	0.085	0.03	2.83333
ENSG00000172264	MACROD2	0.12	0.05	0.085	0.03	2.83333
ENSG00000183091	NEB	0.08	0.09	0.085	0.03	2.83333
ENSG00000212371	SNORA46	1.42	1.47	1.445	0.51	2.83333
ENSG00000236548	RNF217-AS1	0.19	0.15	0.17	0.06	2.83333
ENSG00000246211	RP11-632K5.3	0.06	0.11	0.085	0.03	2.83333
ENSG00000259248	USP3-AS1	0.12	0.22	0.17	0.06	2.83333
ENSG00000269887	RP11-477H21.2	0.06	0.11	0.085	0.03	2.83333
ENSG00000112159	MDN1	1.85	4.72	3.285	1.16	2.8319
ENSG00000276216	CH17-373J23.1	0.81	0.83	0.82	0.29	2.82759
ENSG00000196126	HLA-DRB1	1.11	0.19	0.65	0.23	2.82609
ENSG00000230732	AC127904.2	0.64	0.66	0.65	0.23	2.82609
ENSG00000114631	PODXL2	5.05	5.11	5.08	1.8	2.82222
ENSG00000253500	AF121898.3	0.88	0.7	0.79	0.28	2.82143
ENSG00000241983	RN7SL566P	1.26	0.43	0.845	0.3	2.81667
ENSG00000243137	PSG4	6.42	7.42	6.92	2.46	2.81301
ENSG00000138778	CENPE	15.48	19.94	17.71	6.3	2.81111
ENSG00000212135	SNORD67	2.99	1.84	2.415	0.86	2.80814
ENSG00000251273	RP11-549K20.1	1.71	1.82	1.765	0.63	2.80159
ENSG00000252827	RN7SKP11	6.22	5.04	5.63	2.01	2.801
ENSG00000229331	GK-IT1	0	0.28	0.14	0.05	2.8
ENSG00000228436	RP5-864K19.4	0.35	0.49	0.42	0.15	2.8
ENSG00000259048	CTD-2058B24.2	0.48	0.36	0.42	0.15	2.8
ENSG00000243069	ARHGEF26-AS1	0.5	0.45	0.475	0.17	2.79412
ENSG00000277728	RP11-143K11.7	0.71	1.19	0.95	0.34	2.79412
ENSG00000102287	GABRE	2.67	1.35	2.01	0.72	2.79167
ENSG00000250842	CTC-806A22.1	0.23	0.16	0.195	0.07	2.78571
ENSG00000271938	RP11-589C21.6	0.15	0.24	0.195	0.07	2.78571
ENSG00000207725	MIR222	3.95	2.5	3.225	1.16	2.78017
ENSG00000261838	RP11-303E16.6	0.1	0.4	0.25	0.09	2.77778
ENSG00000271401	RP11-171I2.3	0.27	0.23	0.25	0.09	2.77778
ENSG00000266990	LLNLR-284B4.2	0.63	0.48	0.555	0.2	2.775
ENSG00000226455	RP3-512E2.2	0.22	0.39	0.305	0.11	2.77273
ENSG00000229782	AC118754.4	0.98	0.24	0.61	0.22	2.77273
ENSG00000227060	LINC00629	0.85	0.48	0.665	0.24	2.77083
ENSG00000124678	TCP11	0.49	0.34	0.415	0.15	2.76667
ENSG00000204642	HLA-F	0.51	0.43	0.47	0.17	2.76471
ENSG00000253250	C8orf88	0.9	0.7	0.8	0.29	2.75862
ENSG00000018280	SLC11A1	0.07	0.04	0.055	0.02	2.75
ENSG00000103888	CEMIP	0.14	0.08	0.11	0.04	2.75
ENSG00000151322	NPAS3	0.07	0.04	0.055	0.02	2.75
ENSG00000182759	MAFA	0.04	0.07	0.055	0.02	2.75
ENSG00000198848	CES1	0.04	0.07	0.055	0.02	2.75
ENSG00000229717	RP11-556N4.1	0.08	0.14	0.11	0.04	2.75
ENSG00000249584	RP11-478P10.1	0.07	0.04	0.055	0.02	2.75
ENSG00000261079	RP11-252A24.3	0.07	0.04	0.055	0.02	2.75
ENSG00000273181	RP11-778D9.13	0.13	0.2	0.165	0.06	2.75
ENSG00000274294	RP11-20G13.5	0.1	0.23	0.165	0.06	2.75
ENSG00000042980	ADAM28	0.12	0.1	0.11	0.04	2.75
ENSG00000100276	RASL10A	0.06	0.05	0.055	0.02	2.75
ENSG00000114124	GRK7	0.03	0.08	0.055	0.02	2.75
ENSG00000129437	KLK14	0.11	0	0.055	0.02	2.75
ENSG00000134532	SOX5	0.51	0.37	0.44	0.16	2.75
ENSG00000142233	NTN5	0.06	0.05	0.055	0.02	2.75
ENSG00000152578	GRIA4	0.05	0.06	0.055	0.02	2.75
ENSG00000162669	HFM1	0.07	0.15	0.11	0.04	2.75
ENSG00000165633	VSTM4	0.06	0.05	0.055	0.02	2.75
ENSG00000170290	SLN	0.02	0.2	0.11	0.04	2.75
ENSG00000170683	OR10A3	0.05	0.06	0.055	0.02	2.75
ENSG00000186462	NAP1L2	0.1	0.12	0.11	0.04	2.75
ENSG00000186529	CYP4F3	0.06	0.05	0.055	0.02	2.75
ENSG00000205078	SYCE1L	0.03	0.08	0.055	0.02	2.75
ENSG00000236166	RP3-523C21.2	0.13	0.09	0.11	0.04	2.75
ENSG00000239482	RP11-90K6.1	0.13	0.09	0.11	0.04	2.75
ENSG00000241956	CTC-340A15.2	0.05	0.06	0.055	0.02	2.75
ENSG00000249061	RP11-72L22.1	0.6	0.28	0.44	0.16	2.75
ENSG00000250855	RP11-269F21.1	0	0.22	0.11	0.04	2.75
ENSG00000254827	SLC22A18AS	0.05	0.06	0.055	0.02	2.75
ENSG00000259326	RP11-102L12.2	0.39	0.6	0.495	0.18	2.75
ENSG00000263477	RP11-338L22.2	0.03	0.08	0.055	0.02	2.75
ENSG00000226979	LTA	0.31	0.35	0.33	0.12	2.75
ENSG00000256218	RP11-1038A11.2	0.24	0.09	0.165	0.06	2.75
ENSG00000197134	ZNF257	0.38	0.55	0.465	0.17	2.73529
ENSG00000147437	GNRH1	5.69	5.05	5.37	1.97	2.72589
ENSG00000008710	PKD1	11	7.97	9.485	3.48	2.72557
ENSG00000232537	RP11-385M4.1	1.18	0.4	0.79	0.29	2.72414
ENSG00000167525	PROCA1	0.43	0.44	0.435	0.16	2.71875
ENSG00000112320	SOBP	0.15	0.23	0.19	0.07	2.71429
ENSG00000228216	RP11-367F23.1	0.15	0.23	0.19	0.07	2.71429
ENSG00000263787	RP11-456D7.1	0.24	0.14	0.19	0.07	2.71429
ENSG00000145358	DDIT4L	3.33	2.15	2.74	1.01	2.71287
ENSG00000116678	LEPR	1.17	1.27	1.22	0.45	2.71111
ENSG00000228470	RP11-176D17.3	0.36	0.94	0.65	0.24	2.70833
ENSG00000187243	MAGED4B	4.3	3.22	3.76	1.39	2.70504
ENSG00000201403	SNORD14B	13.22	11.44	12.33	4.56	2.70395
ENSG00000149311	ATM	3.55	8.99	6.27	2.32	2.70259
ENSG00000007968	E2F2	0.79	0.83	0.81	0.3	2.7
ENSG00000100626	GALNT16	0.16	0.11	0.135	0.05	2.7
ENSG00000223643	RP11-108M9.1	0.21	0.06	0.135	0.05	2.7
ENSG00000255117	RP5-1027O15.1	0.27	0	0.135	0.05	2.7
ENSG00000266385	RP11-227G15.8	0.34	0.47	0.405	0.15	2.7
ENSG00000156510	HKDC1	1.97	3.26	2.615	0.97	2.69588
ENSG00000237491	RP11-206L10.9	0.99	1.22	1.105	0.41	2.69512
ENSG00000243444	PALM2	2.61	3.74	3.175	1.18	2.69068
ENSG00000260923	LINC02193	3.29	2.57	2.93	1.09	2.68807
ENSG00000115616	SLC9A2	0.2	0.23	0.215	0.08	2.6875
ENSG00000175967	RP11-544L8__B.4	0.27	0.16	0.215	0.08	2.6875
ENSG00000263727	RP11-806L2.5	0.34	0.09	0.215	0.08	2.6875
ENSG00000266420	RN7SL118P	0.17	0.26	0.215	0.08	2.6875
ENSG00000275226	LINC00547	0.2	0.23	0.215	0.08	2.6875
ENSG00000152785	BMP3	0.51	0.35	0.43	0.16	2.6875
ENSG00000172476	RAB40A	0.25	0.18	0.215	0.08	2.6875
ENSG00000250284	CTB-1I21.1	0.51	0.35	0.43	0.16	2.6875
ENSG00000271724	CTC-359M8.3	0.21	0.22	0.215	0.08	2.6875
ENSG00000225518	LINC01703	0.74	0.76	0.75	0.28	2.67857
ENSG00000232480	TGFB2-AS1	0.15	0.6	0.375	0.14	2.67857
ENSG00000236617	RP11-46H11.12	0.37	0.38	0.375	0.14	2.67857
ENSG00000284204	MIR19A	0	2.89	1.445	0.54	2.67593
ENSG00000207276	RNU6-1160P	0.67	1.04	0.855	0.32	2.67188
ENSG00000131771	PPP1R1B	0.07	0.09	0.08	0.03	2.66667
ENSG00000140678	ITGAX	0.11	0.05	0.08	0.03	2.66667
ENSG00000168961	LGALS9	0.04	0.12	0.08	0.03	2.66667
ENSG00000169918	OTUD7A	0.09	0.07	0.08	0.03	2.66667
ENSG00000170476	MZB1	0.09	0.07	0.08	0.03	2.66667
ENSG00000181804	SLC9A9	0.07	0.09	0.08	0.03	2.66667
ENSG00000182575	NXPH3	0.11	0.05	0.08	0.03	2.66667
ENSG00000184012	TMPRSS2	0.09	0.07	0.08	0.03	2.66667
ENSG00000188153	COL4A5	0.43	0.37	0.4	0.15	2.66667
ENSG00000206062	RP13-212L9.1	0.08	0.08	0.08	0.03	2.66667
ENSG00000234754	C1orf140	0.09	0.07	0.08	0.03	2.66667
ENSG00000238164	RP3-395M20.8	0.1	0.06	0.08	0.03	2.66667
ENSG00000245468	RP11-367J11.3	0.09	0.23	0.16	0.06	2.66667
ENSG00000246731	MGC16275	0.04	0.12	0.08	0.03	2.66667
ENSG00000251388	RP11-427M20.1	0.03	0.13	0.08	0.03	2.66667
ENSG00000255867	DENND5B-AS1	0.11	0.05	0.08	0.03	2.66667
ENSG00000267882	RP4-569M23.5	0.11	0.05	0.08	0.03	2.66667
ENSG00000271871	AC005740.6	0.43	0.21	0.32	0.12	2.66667
ENSG00000242889	RN7SL449P	0.08	0.72	0.4	0.15	2.66667
ENSG00000254675	RP11-7I15.4	0.38	0.1	0.24	0.09	2.66667
ENSG00000264049	MIR4737	1.16	4.76	2.96	1.11	2.66667
ENSG00000277965	Metazoa_SRP	1.48	1.02	1.25	0.47	2.65957
ENSG00000275072	SNORD50B	2.64	1.82	2.23	0.84	2.65476
ENSG00000249740	OSMR-AS1	0.24	0.29	0.265	0.1	2.65
ENSG00000273489	RP11-180C16.1	1.01	1.11	1.06	0.4	2.65
ENSG00000145390	USP53	34.15	38.18	36.165	13.65	2.64945
ENSG00000261761	RP11-103J17.2	1.12	1.21	1.165	0.44	2.64773
ENSG00000099260	PALMD	0.49	0.41	0.45	0.17	2.64706
ENSG00000122420	PTGFR	4.46	5.28	4.87	1.84	2.64674
ENSG00000271924	RNA5SP108	1.91	0.84	1.375	0.52	2.64423
ENSG00000130307	USHBP1	0.19	0.18	0.185	0.07	2.64286
ENSG00000162878	PKDCC	0.39	0.35	0.37	0.14	2.64286
ENSG00000176919	C8G	0.29	0.45	0.37	0.14	2.64286
ENSG00000215403	LL22NC01-81G9.3	0.26	0.32	0.29	0.11	2.63636
ENSG00000229372	SZT2-AS1	0.23	0.35	0.29	0.11	2.63636
ENSG00000114405	C3orf14	29.2	31.27	30.235	11.47	2.63601
ENSG00000158406	HIST1H4H	6.53	11.39	8.96	3.4	2.63529
ENSG00000265465	MIR4768	2.22	1.52	1.87	0.71	2.6338
ENSG00000203364	RP11-370F5.4	0.15	0.64	0.395	0.15	2.63333
ENSG00000275799	AP001059.7	0.36	0.43	0.395	0.15	2.63333
ENSG00000226659	RP11-137H2.4	0.51	0.49	0.5	0.19	2.63158
ENSG00000139988	RDH12	0.04	0.17	0.105	0.04	2.625
ENSG00000174521	TTC9B	0.09	0.12	0.105	0.04	2.625
ENSG00000232810	TNF	0.3	0.12	0.21	0.08	2.625
ENSG00000243081	RP11-231E6.1	0.39	0.24	0.315	0.12	2.625
ENSG00000258851	RP11-894P9.2	0.04	0.17	0.105	0.04	2.625
ENSG00000264317	RN7SL154P	0.25	0.17	0.21	0.08	2.625
ENSG00000272250	RP11-346C20.4	0	0.42	0.21	0.08	2.625
ENSG00000275221	HIST1H2AK	0.52	0.53	0.525	0.2	2.625
ENSG00000278903	CH507-145C22.1	0.33	0.51	0.42	0.16	2.625
ENSG00000278932	bP-21264C1.2	1.15	0.74	0.945	0.36	2.625
ENSG00000283001	RP11-317C20.9	0.1	0.11	0.105	0.04	2.625
ENSG00000283891	MIR628	1.21	0.83	1.02	0.39	2.61538
ENSG00000250846	EPHA5-AS1	0.48	0.2	0.34	0.13	2.61538
ENSG00000274363	RP11-104O19.4	0.78	0.58	0.68	0.26	2.61538
ENSG00000146233	CYP39A1	0.86	0.76	0.81	0.31	2.6129
ENSG00000252614	RNU6-807P	0.96	0.66	0.81	0.31	2.6129
ENSG00000136237	RAPGEF5	1.07	0.81	0.94	0.36	2.61111
ENSG00000231714	RP11-476H20.1	0.29	1.12	0.705	0.27	2.61111
ENSG00000259560	RP11-648K4.2	0.28	0.19	0.235	0.09	2.61111
ENSG00000270021	CTC-203F4.2	0.27	0.2	0.235	0.09	2.61111
ENSG00000282943	CTC-490G23.6	0.22	0.25	0.235	0.09	2.61111
ENSG00000284413	BTBD8	0.74	1.14	0.94	0.36	2.61111
ENSG00000144481	TRPM8	0.11	0.15	0.13	0.05	2.6
ENSG00000203325	RP11-277A4.4	0	0.26	0.13	0.05	2.6
ENSG00000205740	RP11-363N22.3	0.06	0.2	0.13	0.05	2.6
ENSG00000224825	RORB-AS1	0.12	0.14	0.13	0.05	2.6
ENSG00000269480	CTD-3032J10.3	0.8	0.5	0.65	0.25	2.6
ENSG00000275743	TRBV14	0.1	0.16	0.13	0.05	2.6
ENSG00000122133	PAEP	23.04	96.49	59.765	23.02	2.59622
ENSG00000266970	RP11-806H10.4	0.3	0.27	0.285	0.11	2.59091
ENSG00000246339	EXTL3-AS1	0.73	0.41	0.57	0.22	2.59091
ENSG00000171450	CDK5R2	0.47	0.41	0.44	0.17	2.58824
ENSG00000187689	AMTN	0.45	1.31	0.88	0.34	2.58824
ENSG00000264313	RN7SL644P	0.7	0.18	0.44	0.17	2.58824
ENSG00000196358	NTNG2	0.7	0.49	0.595	0.23	2.58696
ENSG00000158220	ESYT3	0.14	0.17	0.155	0.06	2.58333
ENSG00000124334	IL9R	0.16	0.15	0.155	0.06	2.58333
ENSG00000231057	RP11-122M14.1	0.16	0.15	0.155	0.06	2.58333
ENSG00000235214	FAM83C-AS1	0.06	0.25	0.155	0.06	2.58333
ENSG00000257329	RP11-290L1.5	0.12	0.19	0.155	0.06	2.58333
ENSG00000265778	RP11-17M16.2	0.16	0.15	0.155	0.06	2.58333
ENSG00000274620	MIR378J	1.23	0.32	0.775	0.3	2.58333
ENSG00000145362	ANK2	2.58	2.48	2.53	0.98	2.58163
ENSG00000173432	SAA1	0.93	0.67	0.8	0.31	2.58065
ENSG00000258240	RP1-46F2.3	3.51	4.69	4.1	1.59	2.57862
ENSG00000233785	RP13-314C10.5	0.17	0.5	0.335	0.13	2.57692
ENSG00000226397	C12orf77	0.25	0.11	0.18	0.07	2.57143
ENSG00000231903	AC079354.5	0.07	0.29	0.18	0.07	2.57143
ENSG00000267436	AC005786.7	0.14	0.22	0.18	0.07	2.57143
ENSG00000278206	RP1-20N2.8	0.4	0.32	0.36	0.14	2.57143
ENSG00000171729	TMEM51	3.56	3.02	3.29	1.28	2.57031
ENSG00000158639	PAGE5	25.15	51.03	38.09	14.83	2.56844
ENSG00000174718	KIAA1551	14.66	18.32	16.49	6.43	2.56454
ENSG00000266053	NDUFV2-AS1	0.26	0.61	0.435	0.17	2.55882
ENSG00000197046	SIGLEC15	6.07	12.86	9.465	3.7	2.55811
ENSG00000275294	RP11-428O18.6	0.32	0.14	0.23	0.09	2.55556
ENSG00000273247	RP11-83A24.2	0.03	0.43	0.23	0.09	2.55556
ENSG00000226312	CFLAR-AS1	0.49	0.48	0.485	0.19	2.55263
ENSG00000247157	LINC01252	0.26	0.25	0.255	0.1	2.55
ENSG00000281641	SAMD12-AS1	0.42	0.14	0.28	0.11	2.54545
ENSG00000253092	SNORA81	1.8	1.56	1.68	0.66	2.54545
ENSG00000187951	ARHGAP11B	8.2	8.23	8.215	3.23	2.54334
ENSG00000245213	RP11-10K16.1	0.32	0.29	0.305	0.12	2.54167
ENSG00000229539	RP11-119B16.2	0.15	0.56	0.355	0.14	2.53571
ENSG00000196566	RP11-57C13.3	0.52	0.19	0.355	0.14	2.53571
ENSG00000259518	LINC01583	6.76	6.98	6.87	2.71	2.53506
ENSG00000250072	CTC-529P8.1	3.53	3.2	3.365	1.33	2.53008
ENSG00000143333	RGS16	0.36	0.55	0.455	0.18	2.52778
ENSG00000275720	CTB-75G16.3	0.61	0.3	0.455	0.18	2.52778
ENSG00000125551	PLGLB2	18.51	41.29	29.9	11.83	2.52747
ENSG00000255921	RP11-662I13.2	2.31	3.04	2.675	1.06	2.52358
ENSG00000214652	ZNF727	0.19	0.92	0.555	0.22	2.52273
ENSG00000237950	RP11-7O11.3	1.57	0.7	1.135	0.45	2.52222
ENSG00000271590	RP11-181E10.3	2.43	2.56	2.495	0.99	2.5202
ENSG00000248458	RP4-598P13.1	3.82	5.65	4.735	1.88	2.51862
ENSG00000200084	SNORD68	4.23	5.99	5.11	2.03	2.51724
ENSG00000257642	KCCAT198	3.16	3.18	3.17	1.26	2.51587
ENSG00000156127	BATF	1.05	0.96	1.005	0.4	2.5125
ENSG00000203756	TMEM244	0.78	1.38	1.08	0.43	2.51163
ENSG00000251136	RP11-37B2.1	1.06	1.15	1.105	0.44	2.51136
ENSG00000110852	CLEC2B	7.98	8.39	8.185	3.26	2.51074
ENSG00000199753	SNORD104	9.7	7.26	8.48	3.38	2.50888
ENSG00000133135	RNF128	15.23	8.49	11.86	4.73	2.5074
ENSG00000105409	ATP1A3	3.02	1.84	2.43	0.97	2.50515
ENSG00000109943	CRTAM	0.2	0.1	0.15	0.06	2.5
ENSG00000134061	CD180	0.1	0.05	0.075	0.03	2.5
ENSG00000198520	C1orf228	0.27	0.03	0.15	0.06	2.5
ENSG00000225930	DKFZP434L187	0.08	0.07	0.075	0.03	2.5
ENSG00000231407	RP11-576I22.2	0.1	0.05	0.075	0.03	2.5
ENSG00000256690	RP11-727F15.9	0.07	0.08	0.075	0.03	2.5
ENSG00000262319	CTC-457L16.2	0.08	0.07	0.075	0.03	2.5
ENSG00000007312	CD79B	0	0.05	0.025	0.01	2.5
ENSG00000007314	SCN4A	0.02	0.03	0.025	0.01	2.5
ENSG00000009724	MASP2	0.02	0.03	0.025	0.01	2.5
ENSG00000009765	IYD	0.06	0.04	0.05	0.02	2.5
ENSG00000038295	TLL1	0.02	0.03	0.025	0.01	2.5
ENSG00000042062	FAM65C	0.02	0.03	0.025	0.01	2.5
ENSG00000056736	IL17RB	0.16	0.09	0.125	0.05	2.5
ENSG00000076826	CAMSAP3	0.02	0.03	0.025	0.01	2.5
ENSG00000077264	PAK3	0.02	0.03	0.025	0.01	2.5
ENSG00000080166	DCT	0.41	0.09	0.25	0.1	2.5
ENSG00000100985	MMP9	0.12	0.18	0.15	0.06	2.5
ENSG00000101445	PPP1R16B	0.03	0.02	0.025	0.01	2.5
ENSG00000103184	SEC14L5	0.14	0.11	0.125	0.05	2.5
ENSG00000104814	MAP4K1	0.13	0.07	0.1	0.04	2.5
ENSG00000111249	CUX2	0.04	0.01	0.025	0.01	2.5
ENSG00000112333	NR2E1	0.02	0.03	0.025	0.01	2.5
ENSG00000113303	BTNL8	0.03	0.02	0.025	0.01	2.5
ENSG00000114455	HHLA2	0.11	0.09	0.1	0.04	2.5
ENSG00000115252	PDE1A	0.03	0.07	0.05	0.02	2.5
ENSG00000121753	ADGRB2	0.01	0.04	0.025	0.01	2.5
ENSG00000125804	FAM182A	0.04	0.01	0.025	0.01	2.5
ENSG00000126952	NXF5	0.03	0.02	0.025	0.01	2.5
ENSG00000127951	FGL2	0.34	0.06	0.2	0.08	2.5
ENSG00000129221	AIPL1	0.05	0.05	0.05	0.02	2.5
ENSG00000131738	KRT33B	0	0.15	0.075	0.03	2.5
ENSG00000132185	FCRLA	0.01	0.04	0.025	0.01	2.5
ENSG00000134121	CHL1	0.04	0.01	0.025	0.01	2.5
ENSG00000134765	DSC1	0.03	0.02	0.025	0.01	2.5
ENSG00000136267	DGKB	0.03	0.02	0.025	0.01	2.5
ENSG00000136688	IL36G	0.1	0	0.05	0.02	2.5
ENSG00000137507	LRRC32	0.01	0.04	0.025	0.01	2.5
ENSG00000138100	TRIM54	0.03	0.02	0.025	0.01	2.5
ENSG00000142494	SLC47A1	0.02	0.03	0.025	0.01	2.5
ENSG00000144847	IGSF11	0.01	0.04	0.025	0.01	2.5
ENSG00000149043	SYT8	0.04	0.01	0.025	0.01	2.5
ENSG00000151490	PTPRO	0.06	0.04	0.05	0.02	2.5
ENSG00000157578	LCA5L	0.16	0.24	0.2	0.08	2.5
ENSG00000157766	ACAN	0.02	0.03	0.025	0.01	2.5
ENSG00000158473	CD1D	0.03	0.02	0.025	0.01	2.5
ENSG00000162630	B3GALT2	0.05	0	0.025	0.01	2.5
ENSG00000162951	LRRTM1	0.04	0.01	0.025	0.01	2.5
ENSG00000163435	ELF3	0.02	0.03	0.025	0.01	2.5
ENSG00000164122	ASB5	0.05	0.05	0.05	0.02	2.5
ENSG00000164309	CMYA5	0.09	0.11	0.1	0.04	2.5
ENSG00000164488	DACT2	0.01	0.04	0.025	0.01	2.5
ENSG00000164621	SMAD5-AS1	0.02	0.03	0.025	0.01	2.5
ENSG00000165509	MAGEC3	0.1	0	0.05	0.02	2.5
ENSG00000166292	TMEM100	0.03	0.02	0.025	0.01	2.5
ENSG00000166596	CFAP52	0.02	0.03	0.025	0.01	2.5
ENSG00000169594	BNC1	0.02	0.08	0.05	0.02	2.5
ENSG00000169618	PROKR1	0.01	0.04	0.025	0.01	2.5
ENSG00000171596	NMUR1	0.03	0.02	0.025	0.01	2.5
ENSG00000172404	DNAJB7	0.01	0.04	0.025	0.01	2.5
ENSG00000172426	RSPH9	0.05	0.05	0.05	0.02	2.5
ENSG00000174807	CD248	0.13	0.07	0.1	0.04	2.5
ENSG00000175489	LRRC25	0.02	0.03	0.025	0.01	2.5
ENSG00000176160	HSF5	0.01	0.04	0.025	0.01	2.5
ENSG00000177363	LRRN4CL	0.07	0.03	0.05	0.02	2.5
ENSG00000178750	STX19	0.08	0.02	0.05	0.02	2.5
ENSG00000179564	LSMEM2	0.09	0.11	0.1	0.04	2.5
ENSG00000180251	SLC9A4	0.04	0.06	0.05	0.02	2.5
ENSG00000180787	ZFP3	0.3	0.55	0.425	0.17	2.5
ENSG00000183850	ZNF730	0.11	0.09	0.1	0.04	2.5
ENSG00000185052	SLC24A3	0.02	0.03	0.025	0.01	2.5
ENSG00000186212	SOWAHB	0.06	0.04	0.05	0.02	2.5
ENSG00000186472	PCLO	1.26	1.64	1.45	0.58	2.5
ENSG00000187533	PRR27	0.04	0.01	0.025	0.01	2.5
ENSG00000187726	DNAJB13	0.12	0.03	0.075	0.03	2.5
ENSG00000188649	CC2D2B	0.04	0.01	0.025	0.01	2.5
ENSG00000196091	MYBPC1	0.05	0	0.025	0.01	2.5
ENSG00000197213	ZSCAN5B	0.01	0.04	0.025	0.01	2.5
ENSG00000197405	C5AR1	1.06	0.64	0.85	0.34	2.5
ENSG00000197880	MDS2	0.06	0.04	0.05	0.02	2.5
ENSG00000198046	ZNF667	0.02	0.03	0.025	0.01	2.5
ENSG00000203585	RP11-542B15.1	0	0.05	0.025	0.01	2.5
ENSG00000203734	ECT2L	0.05	0.05	0.05	0.02	2.5
ENSG00000204020	LIPN	0.03	0.07	0.05	0.02	2.5
ENSG00000204482	LST1	0.08	0.27	0.175	0.07	2.5
ENSG00000224186	C5orf66	0.11	0.04	0.075	0.03	2.5
ENSG00000224940	PRRT4	0.01	0.04	0.025	0.01	2.5
ENSG00000225362	CT62	0.25	0.3	0.275	0.11	2.5
ENSG00000226674	TEX41	0.04	0.16	0.1	0.04	2.5
ENSG00000226983	LINC01692	0.04	0.01	0.025	0.01	2.5
ENSG00000226996	AP000477.3	0.1	0	0.05	0.02	2.5
ENSG00000228560	RP11-550P17.5	0.09	0.06	0.075	0.03	2.5
ENSG00000229873	OGFR-AS1	0.27	0.18	0.225	0.09	2.5
ENSG00000232874	RP11-135A1.2	0.1	0.35	0.225	0.09	2.5
ENSG00000237356	AL163953.3	0.04	0.16	0.1	0.04	2.5
ENSG00000237452	BHMG1	0.01	0.04	0.025	0.01	2.5
ENSG00000238033	AC002480.2	0.04	0.01	0.025	0.01	2.5
ENSG00000241043	GVQW1	0.12	0.08	0.1	0.04	2.5
ENSG00000245164	LINC00861	0.04	0.01	0.025	0.01	2.5
ENSG00000248307	LINC00616	0.01	0.04	0.025	0.01	2.5
ENSG00000249326	CTD-2194D22.4	0.06	0.04	0.05	0.02	2.5
ENSG00000251298	RP11-425A23.1	0.16	0.04	0.1	0.04	2.5
ENSG00000253414	RP11-150O12.6	0.28	0.12	0.2	0.08	2.5
ENSG00000253506	NACA2	0.05	0.2	0.125	0.05	2.5
ENSG00000253837	RP11-177H13.2	0.04	0.11	0.075	0.03	2.5
ENSG00000254109	RBPMS-AS1	0.06	0.04	0.05	0.02	2.5
ENSG00000254340	RP11-10A14.3	0.06	0.09	0.075	0.03	2.5
ENSG00000255267	RP11-430H10.2	0.03	0.02	0.025	0.01	2.5
ENSG00000256278	RP11-182J1.5	0.08	0.02	0.05	0.02	2.5
ENSG00000256538	RP11-847H18.3	0.1	0.15	0.125	0.05	2.5
ENSG00000259485	CTD-2147F2.1	0.85	1.05	0.95	0.38	2.5
ENSG00000259519	RP11-519G16.2	0.4	0.1	0.25	0.1	2.5
ENSG00000260100	RP11-220I1.5	0.06	0.04	0.05	0.02	2.5
ENSG00000260372	AQP4-AS1	0.07	0.03	0.05	0.02	2.5
ENSG00000260417	CTD-2542L18.1	0.02	0.03	0.025	0.01	2.5
ENSG00000260672	RP11-1006G14.1	0.09	0.11	0.1	0.04	2.5
ENSG00000261055	RP11-195M16.3	0.06	0.09	0.075	0.03	2.5
ENSG00000261319	LINC02152	0	0.05	0.025	0.01	2.5
ENSG00000261411	RP11-268G13.1	0.09	0.06	0.075	0.03	2.5
ENSG00000261437	RP11-22C11.2	0.11	0.09	0.1	0.04	2.5
ENSG00000261438	RP11-399O19.9	0.22	0.23	0.225	0.09	2.5
ENSG00000261663	RP11-304L19.11	0.66	0.39	0.525	0.21	2.5
ENSG00000267122	AC004490.1	0.01	0.04	0.025	0.01	2.5
ENSG00000267452	LINC02073	0.02	0.03	0.025	0.01	2.5
ENSG00000267808	AC018755.17	0.05	0.05	0.05	0.02	2.5
ENSG00000268081	RP11-678G14.2	0	0.25	0.125	0.05	2.5
ENSG00000270171	RP11-338N10.1	0.12	0.08	0.1	0.04	2.5
ENSG00000271167	LINC01109	0.02	0.03	0.025	0.01	2.5
ENSG00000271384	RP11-435O5.7	0.09	0.06	0.075	0.03	2.5
ENSG00000272219	CTB-181H17.1	0.03	0.07	0.05	0.02	2.5
ENSG00000272405	RP11-284F21.10	0.42	0.53	0.475	0.19	2.5
ENSG00000272703	RP11-78A19.4	0.21	0.54	0.375	0.15	2.5
ENSG00000272970	RP11-329B9.4	0.14	0.26	0.2	0.08	2.5
ENSG00000273264	RP11-131L23.2	0.06	0.24	0.15	0.06	2.5
ENSG00000273368	RP11-376P6.3	0.32	0.08	0.2	0.08	2.5
ENSG00000273381	RP11-305L7.7	0.04	0.01	0.025	0.01	2.5
ENSG00000273416	RP4-597N16.4	0.1	0.35	0.225	0.09	2.5
ENSG00000274515	CTD-2026K11.5	0.25	0.2	0.225	0.09	2.5
ENSG00000275672	GATM-AS1	0.18	0.12	0.15	0.06	2.5
ENSG00000276272	RP11-121C6.5	0.03	0.02	0.025	0.01	2.5
ENSG00000276786	WI2-8325B5.1	0.08	0.02	0.05	0.02	2.5
ENSG00000277118	Metazoa_SRP	0.32	0.08	0.2	0.08	2.5
ENSG00000277369	RP11-486I11.2	0.17	0.08	0.125	0.05	2.5
ENSG00000279486	OR2AG1	0.16	0.04	0.1	0.04	2.5
ENSG00000280639	LINC02204	0.11	0.09	0.1	0.04	2.5
ENSG00000283667	RP11-793J2.1	0.18	0.27	0.225	0.09	2.5
ENSG00000130600	H19	0.18	0.17	0.175	0.07	2.5
ENSG00000183044	ABAT	0.7	0.6	0.65	0.26	2.5
ENSG00000225511	LINC00475	0.14	0.21	0.175	0.07	2.5
ENSG00000232811	RP11-96K19.2	0.01	0.09	0.05	0.02	2.5
ENSG00000234273	AC073071.1	0.35	0	0.175	0.07	2.5
ENSG00000264346	SNORA77	4.05	1.49	2.77	1.11	2.4955
ENSG00000154310	TNIK	1.47	1.12	1.295	0.52	2.49038
ENSG00000198932	GPRASP1	2.61	2.22	2.415	0.97	2.48969
ENSG00000260528	FAM157C	5.13	3.82	4.475	1.8	2.48611
ENSG00000231335	AC107072.2	0.29	1.1	0.695	0.28	2.48214
ENSG00000053747	LAMA3	9.41	9.25	9.33	3.76	2.48138
ENSG00000170549	IRX1	0.45	0.64	0.545	0.22	2.47727
ENSG00000266933	AC005775.2	0.67	0.37	0.52	0.21	2.47619
ENSG00000253616	RP11-875O11.3	1.11	1.76	1.435	0.58	2.47414
ENSG00000114923	SLC4A3	1.17	0.71	0.94	0.38	2.47368
ENSG00000254488	RP11-65G9.1	1.72	1.05	1.385	0.56	2.47321
ENSG00000102057	KCND1	1.94	1.72	1.83	0.74	2.47297
ENSG00000270118	RP11-57A19.5	0.41	0.43	0.42	0.17	2.47059
ENSG00000171234	UGT2B7	2.84	3.18	3.01	1.22	2.46721
ENSG00000141469	SLC14A1	6.26	10.51	8.385	3.4	2.46618
ENSG00000274544	SNORD28	4.98	5.13	5.055	2.05	2.46585
ENSG00000234753	FOXP4-AS1	0.39	0.25	0.32	0.13	2.46154
ENSG00000238260	RP11-46F15.2	0.26	0.33	0.295	0.12	2.45833
ENSG00000163864	NMNAT3	0.59	0.59	0.59	0.24	2.45833
ENSG00000273064	RP11-474G23.3	0.72	0.41	0.565	0.23	2.45652
ENSG00000198468	FLVCR1-AS1	0.29	0.25	0.27	0.11	2.45455
ENSG00000244151	RP11-148K1.12	0.3	0.24	0.27	0.11	2.45455
ENSG00000149927	DOC2A	0.53	0.5	0.515	0.21	2.45238
ENSG00000136383	ALPK3	0.29	0.2	0.245	0.1	2.45
ENSG00000214107	MAGEB1	0.76	0.66	0.71	0.29	2.44828
ENSG00000111886	GABRR2	2.45	2.25	2.35	0.96	2.44792
ENSG00000087842	PIR	0.44	0.49	0.465	0.19	2.44737
ENSG00000174501	ANKRD36C	4.75	5.67	5.21	2.13	2.44601
ENSG00000260239	RP11-274H24.1	0.18	0.26	0.22	0.09	2.44444
ENSG00000248360	LINC00504	9.75	14.37	12.06	4.94	2.4413
ENSG00000091844	RGS17	13.16	11.94	12.55	5.15	2.43689
ENSG00000188596	CFAP54	0.71	0.75	0.73	0.3	2.43333
ENSG00000213600	XXcos-LUCA16.1	0.47	0.6	0.535	0.22	2.43182
ENSG00000241472	PTPRG-AS1	2.53	2.77	2.65	1.09	2.43119
ENSG00000204584	RP11-304F15.3	0.75	0.66	0.705	0.29	2.43103
ENSG00000267193	RP11-116O18.3	0.11	0.23	0.17	0.07	2.42857
ENSG00000278071	RP11-736N17.10	0.64	0.62	0.63	0.26	2.42308
ENSG00000198707	CEP290	11.9	12.37	12.135	5.01	2.42216
ENSG00000242221	PSG2	1.2	0.59	0.895	0.37	2.41892
ENSG00000275645	RP11-817O13.9	1.15	0.93	1.04	0.43	2.4186
ENSG00000106006	HOXA6	0.22	0.07	0.145	0.06	2.41667
ENSG00000122728	TAF1L	0.24	0.34	0.29	0.12	2.41667
ENSG00000130433	CACNG6	0.15	0.14	0.145	0.06	2.41667
ENSG00000130751	NPAS1	0.32	0.26	0.29	0.12	2.41667
ENSG00000170500	LONRF2	0.12	0.17	0.145	0.06	2.41667
ENSG00000179136	LINC00670	0.14	0.15	0.145	0.06	2.41667
ENSG00000237851	RP1-67K17.4	0.23	0.06	0.145	0.06	2.41667
ENSG00000269148	AC092301.3	0.13	0.16	0.145	0.06	2.41667
ENSG00000233080	LINC01399	0.44	0.72	0.58	0.24	2.41667
ENSG00000273747	RP11-90B9.3	0.29	0	0.145	0.06	2.41667
ENSG00000221890	NPTXR	0.73	0.67	0.7	0.29	2.41379
ENSG00000188501	LCTL	1	1.22	1.11	0.46	2.41304
ENSG00000264343	NOTCH2NL	3.35	6.06	4.705	1.95	2.41282
ENSG00000112319	EYA4	0.65	0.99	0.82	0.34	2.41176
ENSG00000214559	RP11-323J4.1	0.23	0.83	0.53	0.22	2.40909
ENSG00000253532	CTD-2340D6.1	0.28	0.25	0.265	0.11	2.40909
ENSG00000175197	DDIT3	37.71	53.55	45.63	18.96	2.40665
ENSG00000280191	LINC01669	1.11	0.14	0.625	0.26	2.40385
ENSG00000249409	RP11-501E14.1	3.07	3.7	3.385	1.41	2.40071
ENSG00000259774	RP11-182J1.13	0.39	0.33	0.36	0.15	2.4
ENSG00000260592	CTA-363E6.6	0.33	0.15	0.24	0.1	2.4
ENSG00000272334	RP11-129K12.1	0.29	0.19	0.24	0.1	2.4
ENSG00000275332	CTD-2017F17.1	0.19	0.05	0.12	0.05	2.4
ENSG00000200090	Y_RNA	12.78	9.53	11.155	4.65	2.39892
ENSG00000197635	DPP4	1.06	0.76	0.91	0.38	2.39474
ENSG00000237331	XIAP-AS1	0.33	0.34	0.335	0.14	2.39286
ENSG00000279184	RP3-323A16.1	0.31	0.36	0.335	0.14	2.39286
ENSG00000273007	RP11-170N16.3	0.44	0.66	0.55	0.23	2.3913
ENSG00000250657	RP11-1E6.1	96.33	40.83	68.58	28.69	2.39038
ENSG00000227110	LMCD1-AS1	0.26	0.17	0.215	0.09	2.38889
ENSG00000140287	HDC	0.22	0.21	0.215	0.09	2.38889
ENSG00000267044	AC005757.6	0.14	0.29	0.215	0.09	2.38889
ENSG00000183760	ACP7	7.7	6.01	6.855	2.87	2.3885
ENSG00000199038	MIR210	1.52	1.25	1.385	0.58	2.38793
ENSG00000137642	SORL1	1.58	1.33	1.455	0.61	2.38525
ENSG00000111834	RSPH4A	0.44	0.18	0.31	0.13	2.38462
ENSG00000275576	RP5-836N17.4	0.5	0.74	0.62	0.26	2.38462
ENSG00000226026	RP11-57H12.3	0.3	0.7	0.5	0.21	2.38095
ENSG00000137558	PI15	0.69	0.5	0.595	0.25	2.38
ENSG00000004799	PDK4	9.17	6.84	8.005	3.37	2.37537
ENSG00000255326	CTD-2530H12.4	0.25	0.32	0.285	0.12	2.375
ENSG00000009950	MLXIPL	0.11	0.08	0.095	0.04	2.375
ENSG00000112559	MDFI	0.05	0.14	0.095	0.04	2.375
ENSG00000128604	IRF5	0.28	0.1	0.19	0.08	2.375
ENSG00000230084	RP4-613B23.1	0	0.19	0.095	0.04	2.375
ENSG00000247199	RP11-373N22.3	0.13	0.06	0.095	0.04	2.375
ENSG00000248995	RP11-766N7.4	0.19	0	0.095	0.04	2.375
ENSG00000102189	EEA1	30.69	33.37	32.03	13.49	2.37435
ENSG00000168016	TRANK1	2.88	2.86	2.87	1.21	2.3719
ENSG00000176125	UFSP1	0.31	0.4	0.355	0.15	2.36667
ENSG00000107731	UNC5B	0.19	1.04	0.615	0.26	2.36538
ENSG00000277147	LINC00869	0.58	0.65	0.615	0.26	2.36538
ENSG00000131096	PYY	0.22	0.3	0.26	0.11	2.36364
ENSG00000144821	MYH15	4.17	3.63	3.9	1.65	2.36364
ENSG00000249476	CTD-2587M2.1	0.51	0.53	0.52	0.22	2.36364
ENSG00000183423	LRIT3	0.41	0.44	0.425	0.18	2.36111
ENSG00000182836	PLCXD3	4.03	3.95	3.99	1.69	2.36095
ENSG00000156265	MAP3K7CL	20.86	24.43	22.645	9.6	2.35885
ENSG00000234225	RP4-704D21.2	1.98	1.51	1.745	0.74	2.35811
ENSG00000162692	VCAM1	0.26	0.07	0.165	0.07	2.35714
ENSG00000185960	SHOX	0.44	0.22	0.33	0.14	2.35714
ENSG00000268628	RP1-122P22.4	0.2	0.13	0.165	0.07	2.35714
ENSG00000273492	AP000230.1	0.16	0.17	0.165	0.07	2.35714
ENSG00000224865	AC009518.4	0.18	0.15	0.165	0.07	2.35714
ENSG00000255021	RP11-536I6.2	0.3	0.36	0.33	0.14	2.35714
ENSG00000272911	RP11-74E22.6	0.58	0.08	0.33	0.14	2.35714
ENSG00000156959	LHFPL4	1.36	1.42	1.39	0.59	2.35593
ENSG00000223086	RNA5SP155	1.46	0.75	1.105	0.47	2.35106
ENSG00000261403	RP11-114H24.3	0.25	0.22	0.235	0.1	2.35
ENSG00000272386	RP11-666A8.12	0.42	0.05	0.235	0.1	2.35
ENSG00000273102	AP000569.9	0.89	1.27	1.08	0.46	2.34783
ENSG00000076770	MBNL3	1.83	2.3	2.065	0.88	2.34659
ENSG00000283095	ABC11-4932300O16.1	0.34	0.27	0.305	0.13	2.34615
ENSG00000214922	HLA-F-AS1	0.25	0.36	0.305	0.13	2.34615
ENSG00000269924	RP11-697N18.4	0.47	0.14	0.305	0.13	2.34615
ENSG00000274997	HIST1H2AH	1.42	0.83	1.125	0.48	2.34375
ENSG00000183778	B3GALT5	0.78	0.86	0.82	0.35	2.34286
ENSG00000054793	ATP9A	0.56	1.22	0.89	0.38	2.34211
ENSG00000277130	RP11-530C5.4	1.14	1.2	1.17	0.5	2.34
ENSG00000196912	ANKRD36B	3.42	4.16	3.79	1.62	2.33951
ENSG00000065413	ANKRD44	3.18	3.32	3.25	1.39	2.33813
ENSG00000260141	RP11-19N8.4	1.29	1.28	1.285	0.55	2.33636
ENSG00000207166	SNORA68	5.86	3.81	4.835	2.07	2.33575
ENSG00000144426	NBEAL1	1.96	2.99	2.475	1.06	2.33491
ENSG00000006210	CX3CL1	0.12	0.16	0.14	0.06	2.33333
ENSG00000011347	SYT7	0.1	0.04	0.07	0.03	2.33333
ENSG00000030304	MUSK	0.04	0.1	0.07	0.03	2.33333
ENSG00000051341	POLQ	3.71	3.99	3.85	1.65	2.33333
ENSG00000103089	FA2H	0.06	0.08	0.07	0.03	2.33333
ENSG00000114374	USP9Y	0.08	0.06	0.07	0.03	2.33333
ENSG00000155380	SLC16A1	0.16	0.26	0.21	0.09	2.33333
ENSG00000155719	OTOA	0.09	0.19	0.14	0.06	2.33333
ENSG00000160862	AZGP1	0.06	0.08	0.07	0.03	2.33333
ENSG00000162998	FRZB	0.15	0.13	0.14	0.06	2.33333
ENSG00000168679	SLC16A4	0.33	1.07	0.7	0.3	2.33333
ENSG00000176840	MIR7-3HG	0	0.14	0.07	0.03	2.33333
ENSG00000179141	MTUS2-AS1	0.09	0.05	0.07	0.03	2.33333
ENSG00000182177	ASB18	0.08	0.06	0.07	0.03	2.33333
ENSG00000200959	SNORA74A	0.51	1.17	0.84	0.36	2.33333
ENSG00000228421	AC005013.5	0	0.14	0.07	0.03	2.33333
ENSG00000234460	XXyac-YM21GA2.4	0.23	0.19	0.21	0.09	2.33333
ENSG00000245025	RP11-875O11.1	0.37	0.19	0.28	0.12	2.33333
ENSG00000249502	AC006160.5	0.03	0.11	0.07	0.03	2.33333
ENSG00000250850	RP11-297B17.3	0.08	0.06	0.07	0.03	2.33333
ENSG00000256226	RP11-582E3.2	0.12	0.44	0.28	0.12	2.33333
ENSG00000257835	RP1-97G4.1	0	0.14	0.07	0.03	2.33333
ENSG00000259377	CTD-2308G16.1	0.1	0.04	0.07	0.03	2.33333
ENSG00000267275	CTD-2562J15.6	0.07	0.07	0.07	0.03	2.33333
ENSG00000267774	RP11-2N1.2	0.07	0.07	0.07	0.03	2.33333
ENSG00000271815	CTD-2235C13.3	0.43	0.13	0.28	0.12	2.33333
ENSG00000272858	CTA-292E10.8	0.03	0.11	0.07	0.03	2.33333
ENSG00000279064	CH507-39O4.2	0.09	0.33	0.21	0.09	2.33333
ENSG00000279206	RP5-991G20.6	0.07	0.07	0.07	0.03	2.33333
ENSG00000235303	RP1-79C4.1	0.02	0.12	0.07	0.03	2.33333
ENSG00000223117	RN7SKP296	1.38	0.9	1.14	0.49	2.32653
ENSG00000267114	CTB-129P6.11	0.3	0.49	0.395	0.17	2.32353
ENSG00000229647	MYOSLID	1.42	1.18	1.3	0.56	2.32143
ENSG00000120899	PTK2B	2.01	1.75	1.88	0.81	2.32099
ENSG00000174586	ZNF497	0.25	0.26	0.255	0.11	2.31818
ENSG00000253424	CTC-436K13.3	0.46	0.56	0.51	0.22	2.31818
ENSG00000253636	RP11-531A24.5	0.22	0.29	0.255	0.11	2.31818
ENSG00000259631	RP11-557C18.4	0.6	0.28	0.44	0.19	2.31579
ENSG00000233970	AC092159.3	0.99	0.26	0.625	0.27	2.31481
ENSG00000239494	RN7SL333P	0.19	1.06	0.625	0.27	2.31481
ENSG00000101489	CELF4	0.18	0.19	0.185	0.08	2.3125
ENSG00000229463	LYST-AS1	0.16	0.21	0.185	0.08	2.3125
ENSG00000262362	LA16c-380H5.2	0.5	0.24	0.37	0.16	2.3125
ENSG00000236200	KDM4A-AS1	0.38	0.59	0.485	0.21	2.30952
ENSG00000201579	RNU6-343P	2.18	2.62	2.4	1.04	2.30769
ENSG00000268129	RP11-91G21.1	0.8	1.6	1.2	0.52	2.30769
ENSG00000176533	GNG7	0.3	0.3	0.3	0.13	2.30769
ENSG00000243130	PSG11	2.51	1.78	2.145	0.93	2.30645
ENSG00000172602	RND1	0.84	1.05	0.945	0.41	2.30488
ENSG00000169429	CXCL8	68.2	99.73	83.965	36.45	2.30357
ENSG00000161647	MPP3	13.99	11.85	12.92	5.61	2.30303
ENSG00000260975	RP11-142G1.3	0.5	1.02	0.76	0.33	2.30303
ENSG00000049249	TNFRSF9	0.19	0.27	0.23	0.1	2.3
ENSG00000165606	DRGX	0.16	0.07	0.115	0.05	2.3
ENSG00000172578	KLHL6	0.14	0.09	0.115	0.05	2.3
ENSG00000215271	HOMEZ	0.11	0.12	0.115	0.05	2.3
ENSG00000233665	RP11-523O18.5	0.2	0.26	0.23	0.1	2.3
ENSG00000273151	RP11-449P15.2	0.1	0.13	0.115	0.05	2.3
ENSG00000276754	RP11-461A8.5	0	0.23	0.115	0.05	2.3
ENSG00000048052	HDAC9	7.49	7.99	7.74	3.37	2.29674
ENSG00000124731	TREM1	1.93	1.56	1.745	0.76	2.29605
ENSG00000236256	DIAPH2-AS1	0.53	0.48	0.505	0.22	2.29545
ENSG00000197140	ADAM32	0.41	0.37	0.39	0.17	2.29412
ENSG00000273058	RP11-385F5.5	0.56	0.77	0.665	0.29	2.2931
ENSG00000118898	PPL	1.79	1.19	1.49	0.65	2.29231
ENSG00000187796	CARD9	0.26	0.29	0.275	0.12	2.29167
ENSG00000266569	RN7SL377P	0.6	1	0.8	0.35	2.28571
ENSG00000140093	SERPINA10	0.16	0.16	0.16	0.07	2.28571
ENSG00000185100	ADSSL1	0.18	0.14	0.16	0.07	2.28571
ENSG00000198670	LPA	0.32	0.32	0.32	0.14	2.28571
ENSG00000265813	RN7SL300P	0.08	0.24	0.16	0.07	2.28571
ENSG00000267199	RP11-861E21.2	0.51	0.77	0.64	0.28	2.28571
ENSG00000082482	KCNK2	0.95	1.06	1.005	0.44	2.28409
ENSG00000259380	RP11-346D14.1	25.8	30.51	28.155	12.33	2.28345
ENSG00000138670	RASGEF1B	0.86	1.24	1.05	0.46	2.28261
ENSG00000271270	TMCC1-AS1	1.17	1.34	1.255	0.55	2.28182
ENSG00000127914	AKAP9	7.31	9.07	8.19	3.59	2.28134
ENSG00000177380	PPFIA3	0.47	0.26	0.365	0.16	2.28125
ENSG00000253880	RP11-124B13.1	1.12	0.75	0.935	0.41	2.28049
ENSG00000267416	CTD-2319I12.2	0.53	0.61	0.57	0.25	2.28
ENSG00000227375	DLG1-AS1	0.14	0.27	0.205	0.09	2.27778
ENSG00000231429	RP11-343N15.2	0.18	0.23	0.205	0.09	2.27778
ENSG00000248211	TRPC7-AS1	0.18	0.23	0.205	0.09	2.27778
ENSG00000165805	C12orf50	0.6	0.63	0.615	0.27	2.27778
ENSG00000168899	VAMP5	1.13	0.51	0.82	0.36	2.27778
ENSG00000211697	TRGV5	0.37	0.86	0.615	0.27	2.27778
ENSG00000165171	WBSCR27	1.54	2.01	1.775	0.78	2.27564
ENSG00000231185	AC005592.2	0.64	0.77	0.705	0.31	2.27419
ENSG00000266618	MIR4742	5.14	1.59	3.365	1.48	2.27365
ENSG00000275092	LA16c-329F2.2	0.17	0.42	0.295	0.13	2.26923
ENSG00000276768	RP5-1116H23.5	0.18	0.41	0.295	0.13	2.26923
ENSG00000247400	DNAJC3-AS1	0.55	0.72	0.635	0.28	2.26786
ENSG00000016402	IL20RA	0.27	0.41	0.34	0.15	2.26667
ENSG00000183354	KIAA2026	6.61	6.17	6.39	2.82	2.26596
ENSG00000118514	ALDH8A1	0.9	0.55	0.725	0.32	2.26563
ENSG00000112299	VNN1	0.75	0.79	0.77	0.34	2.26471
ENSG00000188818	ZDHHC11	0.57	0.38	0.475	0.21	2.2619
ENSG00000278769	CTD-2036P10.5	0.46	0.67	0.565	0.25	2.26
ENSG00000081041	CXCL2	10.47	12.77	11.62	5.15	2.25631
ENSG00000229692	SOS1-IT1	0.64	1.48	1.06	0.47	2.25532
ENSG00000283929	MIR5010	5.74	2.15	3.945	1.75	2.25429
ENSG00000251026	LINC02163	1.4	1.98	1.69	0.75	2.25333
ENSG00000222881	Y_RNA	2.69	3.12	2.905	1.29	2.25194
ENSG00000230943	RP11-367G18.1	0	0.27	0.135	0.06	2.25
ENSG00000231806	PCAT7	0.1	0.17	0.135	0.06	2.25
ENSG00000261642	RP11-309H21.3	0.1	0.17	0.135	0.06	2.25
ENSG00000280744	LINC01173	0.13	0.14	0.135	0.06	2.25
ENSG00000011083	SLC6A7	0.05	0.04	0.045	0.02	2.25
ENSG00000011465	DCN	0.03	0.06	0.045	0.02	2.25
ENSG00000087076	HSD17B14	0.05	0.13	0.09	0.04	2.25
ENSG00000099810	MTAP	0.04	0.05	0.045	0.02	2.25
ENSG00000103154	NECAB2	0.04	0.05	0.045	0.02	2.25
ENSG00000110203	FOLR3	0.09	0	0.045	0.02	2.25
ENSG00000117215	PLA2G2D	0.06	0.03	0.045	0.02	2.25
ENSG00000124256	ZBP1	0.01	0.08	0.045	0.02	2.25
ENSG00000127324	TSPAN8	0.03	0.06	0.045	0.02	2.25
ENSG00000140022	STON2	0.04	0.05	0.045	0.02	2.25
ENSG00000145911	N4BP3	0.03	0.06	0.045	0.02	2.25
ENSG00000145936	KCNMB1	0.06	0.03	0.045	0.02	2.25
ENSG00000148942	SLC5A12	0.06	0.12	0.09	0.04	2.25
ENSG00000171724	VAT1L	0.07	0.11	0.09	0.04	2.25
ENSG00000184374	COLEC10	0.09	0.09	0.09	0.04	2.25
ENSG00000196668	LINC00173	0.38	0.25	0.315	0.14	2.25
ENSG00000197210	KB-1592A4.15	0.04	0.05	0.045	0.02	2.25
ENSG00000197565	COL4A6	0.06	0.03	0.045	0.02	2.25
ENSG00000205488	CALML3-AS1	0.05	0.04	0.045	0.02	2.25
ENSG00000214188	ST7-OT4	0.09	0.09	0.09	0.04	2.25
ENSG00000227492	RP11-316M21.6	0.11	0.25	0.18	0.08	2.25
ENSG00000233723	LINC01122	0.04	0.05	0.045	0.02	2.25
ENSG00000237181	AC147651.4	0.14	0.22	0.18	0.08	2.25
ENSG00000237339	LINC01502	0.03	0.06	0.045	0.02	2.25
ENSG00000237945	LINC00649	0.1	0.08	0.09	0.04	2.25
ENSG00000242866	STRC	0.05	0.04	0.045	0.02	2.25
ENSG00000247287	RP11-902B17.1	0.05	0.04	0.045	0.02	2.25
ENSG00000255478	RP11-867O8.5	0.09	0.09	0.09	0.04	2.25
ENSG00000255680	RP11-732A19.9	0.04	0.14	0.09	0.04	2.25
ENSG00000257607	RP11-449P15.1	0.05	0.04	0.045	0.02	2.25
ENSG00000258573	RP11-14J7.6	0.05	0.04	0.045	0.02	2.25
ENSG00000259265	RP11-809H16.4	0.13	0.05	0.09	0.04	2.25
ENSG00000260271	RP1-45N11.1	0.13	0.05	0.09	0.04	2.25
ENSG00000260653	RP11-114G11.5	0.04	0.05	0.045	0.02	2.25
ENSG00000263063	RP11-388C12.1	0.11	0.07	0.09	0.04	2.25
ENSG00000266805	RP11-61L19.1	0.15	0.03	0.09	0.04	2.25
ENSG00000272137	RP11-177G23.2	0.09	0.09	0.09	0.04	2.25
ENSG00000275371	RP11-455F5.6	0.2	0.16	0.18	0.08	2.25
ENSG00000277420	CH17-408M7.1	0.06	0.03	0.045	0.02	2.25
ENSG00000280213	UCKL1-AS1	0.2	0.16	0.18	0.08	2.25
ENSG00000280356	RP1-101G11.3	0.06	0.03	0.045	0.02	2.25
ENSG00000283597	FAM169B	0.04	0.05	0.045	0.02	2.25
ENSG00000283632	EXOC3L2	0.12	0.06	0.09	0.04	2.25
ENSG00000136895	GARNL3	1.64	1.37	1.505	0.67	2.24627
ENSG00000177025	C19orf18	1.18	1.47	1.325	0.59	2.24576
ENSG00000126368	NR1D1	12.14	15.18	13.66	6.1	2.23934
ENSG00000250501	RP11-98O2.1	0.54	0.49	0.515	0.23	2.23913
ENSG00000261101	RP4-545K15.5	1.62	1.38	1.5	0.67	2.23881
ENSG00000234998	RP11-439A17.10	0.1	0.75	0.425	0.19	2.23684
ENSG00000223839	FAM95B1	1.42	1.26	1.34	0.6	2.23333
ENSG00000198794	SCAMP5	7.84	7.69	7.765	3.48	2.23132
ENSG00000273145	CITF22-92A6.1	0.35	0.23	0.29	0.13	2.23077
ENSG00000182109	RP11-69E11.4	0.57	0.41	0.49	0.22	2.22727
ENSG00000267011	CTB-50L17.16	0.12	0.37	0.245	0.11	2.22727
ENSG00000272529	RP11-415F23.4	1.07	0.8	0.935	0.42	2.22619
ENSG00000199363	SNORA63	2.48	1.39	1.935	0.87	2.22414
ENSG00000180332	KCTD4	0.36	0.04	0.2	0.09	2.22222
ENSG00000197815	RP1-253P7.4	0.2	0.2	0.2	0.09	2.22222
ENSG00000270580	PKD1P6-NPIPP1	15.18	14.67	14.925	6.72	2.22098
ENSG00000261596	CTB-31N19.3	0.78	0.73	0.755	0.34	2.22059
ENSG00000237870	AC073130.1	4.03	5.91	4.97	2.24	2.21875
ENSG00000101745	ANKRD12	13.34	15.72	14.53	6.55	2.21832
ENSG00000254620	RP5-907D15.3	1.98	1.79	1.885	0.85	2.21765
ENSG00000226572	SNORD57	9.66	7.46	8.56	3.86	2.21762
ENSG00000228817	BACH1-IT2	0.39	0.63	0.51	0.23	2.21739
ENSG00000273001	RP11-118K6.3	0.52	0.5	0.51	0.23	2.21739
ENSG00000185860	CCDC190	1.51	1.15	1.33	0.6	2.21667
ENSG00000120664	SPG20-AS1	0.47	0.15	0.31	0.14	2.21429
ENSG00000245479	LINC01585	0.15	0.16	0.155	0.07	2.21429
ENSG00000258673	LINC01397	0.24	0.07	0.155	0.07	2.21429
ENSG00000279954	WI2-85898F10.2	0.18	0.13	0.155	0.07	2.21429
ENSG00000125744	RTN2	15.52	14	14.76	6.67	2.21289
ENSG00000172006	ZNF554	1.3	1.53	1.415	0.64	2.21094
ENSG00000260778	RP11-304L19.13	0.54	0.3	0.42	0.19	2.21053
ENSG00000250127	LINC02108	2.75	3.66	3.205	1.45	2.21034
ENSG00000171316	CHD7	3.28	3.39	3.335	1.51	2.20861
ENSG00000248516	RP11-265O12.1	0.43	0.1	0.265	0.12	2.20833
ENSG00000254081	LINC01299	0.25	0.28	0.265	0.12	2.20833
ENSG00000163734	CXCL3	4.39	6.56	5.475	2.48	2.20766
ENSG00000228709	AP001065.15	0.64	0.64	0.64	0.29	2.2069
ENSG00000073605	GSDMB	3.09	2.03	2.56	1.16	2.2069
ENSG00000171346	KRT15	4.68	3.22	3.95	1.79	2.2067
ENSG00000125538	IL1B	2.46	2.57	2.515	1.14	2.20614
ENSG00000203711	C6orf99	0.41	0.34	0.375	0.17	2.20588
ENSG00000255521	RP4-607I7.1	0.26	0.49	0.375	0.17	2.20588
ENSG00000257839	RP11-290L1.2	0.38	0.37	0.375	0.17	2.20588
ENSG00000203446	AC004988.1	0.48	0.49	0.485	0.22	2.20455
ENSG00000132386	SERPINF1	4.98	8.29	6.635	3.01	2.20432
ENSG00000263338	RP11-235E17.3	0.81	0.38	0.595	0.27	2.2037
ENSG00000261630	RP11-357N13.3	0.82	0.59	0.705	0.32	2.20312
ENSG00000023445	BIRC3	14.6	15.53	15.065	6.84	2.20249
ENSG00000269938	RP11-214K3.20	0.87	0.98	0.925	0.42	2.20238
ENSG00000255372	CTD-3064C13.1	0.69	0.85	0.77	0.35	2.2
ENSG00000273104	CMP21-97G8.1	0.05	0.17	0.11	0.05	2.2
ENSG00000111405	ENDOU	0.12	0.1	0.11	0.05	2.2
ENSG00000132698	RAB25	0.09	0.13	0.11	0.05	2.2
ENSG00000214803	RP11-37N22.1	0.07	0.15	0.11	0.05	2.2
ENSG00000273691	RP11-617F23.2	0.07	0.15	0.11	0.05	2.2
ENSG00000145107	TM4SF19	14.5	12.91	13.705	6.23	2.19984
ENSG00000137561	TTPA	0.59	0.86	0.725	0.33	2.19697
ENSG00000253214	RP11-1149M10.2	0.44	1.01	0.725	0.33	2.19697
ENSG00000276250	CTD-2349P21.12	0.59	0.86	0.725	0.33	2.19697
ENSG00000277218	RP11-500G10.5	0.58	0.65	0.615	0.28	2.19643
ENSG00000283209	RP11-347L15.1	0.93	0.3	0.615	0.28	2.19643
ENSG00000242474	AC093627.9	0.45	0.56	0.505	0.23	2.19565
ENSG00000282508	LINC01002	10.67	4.52	7.595	3.46	2.19509
ENSG00000258123	RP11-314D7.2	0.8	0.78	0.79	0.36	2.19444
ENSG00000260236	RP11-708J19.1	0.41	0.38	0.395	0.18	2.19444
ENSG00000264964	RP11-888D10.3	1.2	0.95	1.075	0.49	2.19388
ENSG00000173275	ZNF449	2.31	2.12	2.215	1.01	2.19307
ENSG00000089682	RBM41	12.7	12.6	12.65	5.77	2.19237
ENSG00000270130	RP11-214K3.23	0.5	0.64	0.57	0.26	2.19231
ENSG00000183486	MX2	0.99	0.72	0.855	0.39	2.19231
ENSG00000146021	KLHL3	1.84	0.7	1.27	0.58	2.18966
ENSG00000240240	RP11-146D12.2	0.65	0.97	0.81	0.37	2.18919
ENSG00000067798	NAV3	20.37	20.15	20.26	9.26	2.1879
ENSG00000085563	ABCB1	0.16	0.19	0.175	0.08	2.1875
ENSG00000186912	P2RY4	0.12	0.23	0.175	0.08	2.1875
ENSG00000196482	ESRRG	0.18	0.17	0.175	0.08	2.1875
ENSG00000198221	AFDN-AS1	0.38	0.32	0.35	0.16	2.1875
ENSG00000234902	AC007879.2	0.2	0.15	0.175	0.08	2.1875
ENSG00000255343	RP11-299M14.2	0.35	0	0.175	0.08	2.1875
ENSG00000258099	ATXN2-AS	0.13	0.22	0.175	0.08	2.1875
ENSG00000272094	RP4-665J23.4	0.7	0.48	0.59	0.27	2.18519
ENSG00000231760	RP11-350J20.5	0.2	0.28	0.24	0.11	2.18182
ENSG00000272381	RP11-192P3.4	0.19	0.29	0.24	0.11	2.18182
ENSG00000275901	Metazoa_SRP	0	0.96	0.48	0.22	2.18182
ENSG00000074211	PPP2R2C	12.74	12.91	12.825	5.88	2.18112
ENSG00000189186	DCAF8L2	2.59	0.07	1.33	0.61	2.18033
ENSG00000115738	ID2	5.07	4.29	4.68	2.15	2.17674
ENSG00000228262	LINC01320	0.48	0.26	0.37	0.17	2.17647
ENSG00000233338	TLR8-AS1	1.6	2.23	1.915	0.88	2.17614
ENSG00000092621	PHGDH	1.49	7.72	4.605	2.12	2.17217
ENSG00000223949	ROR1-AS1	0.93	1.11	1.02	0.47	2.17021
ENSG00000144674	GOLGA4	35.5	39.99	37.745	17.4	2.16925
ENSG00000172766	NAA16	11.75	11.53	11.64	5.37	2.1676
ENSG00000101280	ANGPT4	0.05	0.08	0.065	0.03	2.16667
ENSG00000105219	CNTD2	0.17	0.09	0.13	0.06	2.16667
ENSG00000106078	COBL	0.08	0.05	0.065	0.03	2.16667
ENSG00000135917	SLC19A3	0.04	0.09	0.065	0.03	2.16667
ENSG00000145248	SLC10A4	0.06	0.07	0.065	0.03	2.16667
ENSG00000160282	FTCD	0.09	0.04	0.065	0.03	2.16667
ENSG00000162896	PIGR	0.07	0.06	0.065	0.03	2.16667
ENSG00000172782	FADS6	0.11	0.02	0.065	0.03	2.16667
ENSG00000175445	LPL	0.18	0.08	0.13	0.06	2.16667
ENSG00000177989	ODF3B	0.84	0.46	0.65	0.3	2.16667
ENSG00000196189	SEMA4A	0.31	0.08	0.195	0.09	2.16667
ENSG00000198535	C2CD4A	0.14	0.12	0.13	0.06	2.16667
ENSG00000214919	RP11-674E16.4	0.1	0.03	0.065	0.03	2.16667
ENSG00000224965	KCNC4-AS1	0.05	0.08	0.065	0.03	2.16667
ENSG00000228192	RP11-342M1.3	0.1	0.03	0.065	0.03	2.16667
ENSG00000239440	LINC02008	0.11	0.15	0.13	0.06	2.16667
ENSG00000248228	SLIT2-IT1	0.1	0.03	0.065	0.03	2.16667
ENSG00000249307	LINC01088	0.13	0	0.065	0.03	2.16667
ENSG00000250969	RP11-364L4.3	0.03	0.1	0.065	0.03	2.16667
ENSG00000254027	RP11-363E6.3	0.06	0.07	0.065	0.03	2.16667
ENSG00000257120	CTD-2503I6.1	0.19	0.07	0.13	0.06	2.16667
ENSG00000257829	RP11-845M18.6	0	0.13	0.065	0.03	2.16667
ENSG00000258860	RP11-561B11.3	0.03	0.1	0.065	0.03	2.16667
ENSG00000264530	RN7SL25P	0.45	0.46	0.455	0.21	2.16667
ENSG00000272236	XXbac-BPG170G13.32	0.19	0.2	0.195	0.09	2.16667
ENSG00000274253	RP11-566K19.6	0.16	0.1	0.13	0.06	2.16667
ENSG00000275481	RP11-474P2.6	0.21	0.18	0.195	0.09	2.16667
ENSG00000283175	RP11-208N14.5	0.11	0.02	0.065	0.03	2.16667
ENSG00000208018	MIR645	0	1.69	0.845	0.39	2.16667
ENSG00000226372	DCAF8L1	0.35	0.04	0.195	0.09	2.16667
ENSG00000200879	SNORD14E	11.83	11.65	11.74	5.42	2.16605
ENSG00000083223	ZCCHC6	23.58	28.37	25.975	12.02	2.16098
ENSG00000145734	BDP1	4.96	9.12	7.04	3.26	2.15951
ENSG00000264963	RN7SL440P	0.35	0.6	0.475	0.22	2.15909
ENSG00000135549	PKIB	14.92	14.88	14.9	6.91	2.1563
ENSG00000158352	SHROOM4	0.68	0.57	0.625	0.29	2.15517
ENSG00000130529	TRPM4	2.41	1.77	2.09	0.97	2.15464
ENSG00000205334	LINC01460	0.22	0.34	0.28	0.13	2.15385
ENSG00000256977	LIMS3	0.49	0.07	0.28	0.13	2.15385
ENSG00000258515	RP11-203M5.7	0.18	0.38	0.28	0.13	2.15385
ENSG00000267405	CTC-296K1.4	0.31	0.25	0.28	0.13	2.15385
ENSG00000170516	COX7B2	24.29	12.14	18.215	8.46	2.15307
ENSG00000207205	RNVU1-15	0	1.42	0.71	0.33	2.15152
ENSG00000186787	SPIN2B	3.39	3.02	3.205	1.49	2.15101
ENSG00000147231	CXorf57	1.51	1.2	1.355	0.63	2.15079
ENSG00000205861	PCOTH	0.43	0	0.215	0.1	2.15
ENSG00000131016	AKAP12	126.53	146.84	136.685	63.6	2.14914
ENSG00000264229	RNU4ATAC	0	1.16	0.58	0.27	2.14815
ENSG00000114771	AADAC	1.84	2.24	2.04	0.95	2.14737
ENSG00000227502	LINC01268	0.25	0.48	0.365	0.17	2.14706
ENSG00000143341	HMCN1	1.05	1.44	1.245	0.58	2.14655
ENSG00000172969	FRG2C	0.27	0.03	0.15	0.07	2.14286
ENSG00000254653	RP11-702F3.1	0.15	0.15	0.15	0.07	2.14286
ENSG00000261654	RP11-96K19.4	0.17	0.13	0.15	0.07	2.14286
ENSG00000268618	AC092316.1	0.3	0	0.15	0.07	2.14286
ENSG00000149050	ZNF214	1.69	2.25	1.97	0.92	2.1413
ENSG00000221394	MIR1229	0	3.81	1.905	0.89	2.14045
ENSG00000207280	SNORD20	1.19	3.69	2.44	1.14	2.14035
ENSG00000272379	RP1-257A7.5	0.92	2.29	1.605	0.75	2.14
ENSG00000250948	RP11-1079K10.2	0.38	0.39	0.385	0.18	2.13889
ENSG00000260126	RP11-14N9.2	0.41	0.36	0.385	0.18	2.13889
ENSG00000207185	RNU6-1157P	0.84	0.87	0.855	0.4	2.1375
ENSG00000260945	RP11-916L7.1	0.27	0.2	0.235	0.11	2.13636
ENSG00000205090	TMEM240	0.3	0.17	0.235	0.11	2.13636
ENSG00000277950	Metazoa_SRP	0.23	0.71	0.47	0.22	2.13636
ENSG00000239713	APOBEC3G	1.1	1.12	1.11	0.52	2.13462
ENSG00000169550	MUC15	7.64	7.94	7.79	3.65	2.13425
ENSG00000259782	CTD-2270L9.2	0.38	0.26	0.32	0.15	2.13333
ENSG00000278703	RP11-706P11.2	0.58	0.7	0.64	0.3	2.13333
ENSG00000163823	CCR1	2.61	1.61	2.11	0.99	2.13131
ENSG00000273183	RP11-5C23.2	0.5	0.48	0.49	0.23	2.13043
ENSG00000182308	DCAF4L1	1.74	1.54	1.64	0.77	2.12987
ENSG00000257475	RP11-983P16.2	0.68	0.47	0.575	0.27	2.12963
ENSG00000116663	FBXO6	0.46	0.86	0.66	0.31	2.12903
ENSG00000272159	RP11-350N15.6	0.92	1.42	1.17	0.55	2.12727
ENSG00000276002	Metazoa_SRP	2.31	2.75	2.53	1.19	2.12605
ENSG00000155307	SAMSN1	0.68	0.34	0.51	0.24	2.125
ENSG00000178404	CEP295NL	0.23	0.28	0.255	0.12	2.125
ENSG00000179954	SSC5D	0.1	0.07	0.085	0.04	2.125
ENSG00000228536	RP11-392O17.1	0.04	0.13	0.085	0.04	2.125
ENSG00000228661	AC090587.5	0	0.17	0.085	0.04	2.125
ENSG00000233757	AC092835.2	0.07	0.1	0.085	0.04	2.125
ENSG00000233766	AC098617.1	0.07	0.1	0.085	0.04	2.125
ENSG00000235078	AC142528.1	0.16	0.35	0.255	0.12	2.125
ENSG00000252018	RNU2-30P	0.25	0.77	0.51	0.24	2.125
ENSG00000253799	LINC01030	0.28	0.06	0.17	0.08	2.125
ENSG00000254812	RP11-661A12.12	0.25	0.26	0.255	0.12	2.125
ENSG00000254826	CTD-2530H12.2	0.07	0.1	0.085	0.04	2.125
ENSG00000272609	RP11-461M2.2	0.13	0.04	0.085	0.04	2.125
ENSG00000273090	RP11-78I14.1	0.04	0.13	0.085	0.04	2.125
ENSG00000279440	CTA-992D9.11	0.1	0.07	0.085	0.04	2.125
ENSG00000012779	ALOX5	0.09	0.08	0.085	0.04	2.125
ENSG00000182183	FAM159A	0.08	0.09	0.085	0.04	2.125
ENSG00000213471	TTLL13P	0.09	0.08	0.085	0.04	2.125
ENSG00000224717	RP11-576D8.4	0.11	0.06	0.085	0.04	2.125
ENSG00000224822	THRB-IT1	0.06	0.11	0.085	0.04	2.125
ENSG00000246323	RP11-325L7.1	0.06	0.11	0.085	0.04	2.125
ENSG00000254231	CTD-2284J15.1	0.08	0.09	0.085	0.04	2.125
ENSG00000263961	C1orf186	0.09	0.08	0.085	0.04	2.125
ENSG00000119915	ELOVL3	1.09	1.2	1.145	0.54	2.12037
ENSG00000273035	RP11-449G16.1	0.91	1.38	1.145	0.54	2.12037
ENSG00000214655	ZSWIM8	22.62	15.63	19.125	9.02	2.12029
ENSG00000252620	RNU6ATAC24P	0	0.89	0.445	0.21	2.11905
ENSG00000272498	RP11-415F23.3	0.83	0.78	0.805	0.38	2.11842
ENSG00000237596	RP13-143G15.4	1.51	2.26	1.885	0.89	2.11798
ENSG00000157423	HYDIN	0.25	0.47	0.36	0.17	2.11765
ENSG00000129173	E2F8	6.05	6.23	6.14	2.9	2.11724
ENSG00000257242	LINC01619	1.07	0.92	0.995	0.47	2.11702
ENSG00000118412	CASP8AP2	9.37	9.68	9.525	4.5	2.11667
ENSG00000277127	Metazoa_SRP	1.05	0.77	0.91	0.43	2.11628
ENSG00000203411	Metazoa_SRP	0.27	0.83	0.55	0.26	2.11538
ENSG00000242242	PVRL3-AS1	1.29	0.36	0.825	0.39	2.11538
ENSG00000263940	RN7SL275P	0.27	0.28	0.275	0.13	2.11538
ENSG00000269946	RP11-2B6.3	0.9	1.13	1.015	0.48	2.11458
ENSG00000269688	AC008982.2	1.14	1.82	1.48	0.7	2.11429
ENSG00000277635	Metazoa_SRP	2.4	1.49	1.945	0.92	2.11413
ENSG00000155085	AK9	0.43	0.33	0.38	0.18	2.11111
ENSG00000206567	AC022007.5	0.25	0.13	0.19	0.09	2.11111
ENSG00000272510	RP4-680D5.8	0.37	0.39	0.38	0.18	2.11111
ENSG00000282849	RP11-121P12.1	0.09	0.29	0.19	0.09	2.11111
ENSG00000273196	RP11-717A5.2	13.88	7.94	10.91	5.17	2.11025
ENSG00000197044	ZNF441	2.45	2.91	2.68	1.27	2.11024
ENSG00000266071	MIR3617	1.85	0.64	1.245	0.59	2.11017
ENSG00000270048	RP11-214K3.22	1.04	1.07	1.055	0.5	2.11
ENSG00000251821	RNU6-583P	1.29	0.44	0.865	0.41	2.10976
ENSG00000233895	RP1-122P22.2	1.09	1.44	1.265	0.6	2.10833
ENSG00000207003	RNU6-611P	3.09	1.59	2.34	1.11	2.10811
ENSG00000284411	MIR3191	1.37	1.41	1.39	0.66	2.10606
ENSG00000202503	SNORD34	1.68	1.73	1.705	0.81	2.10494
ENSG00000238793	SNORD124	4.04	1.39	2.715	1.29	2.10465
ENSG00000270210	RP11-373D23.3	0.59	0.42	0.505	0.24	2.10417
ENSG00000250920	RP11-297P16.4	0.98	0.45	0.715	0.34	2.10294
ENSG00000271141	RP11-171I2.4	1.39	1.47	1.43	0.68	2.10294
ENSG00000229666	MAST4-AS1	0.99	1.07	1.03	0.49	2.10204
ENSG00000101470	TNNC2	0.05	0.16	0.105	0.05	2.1
ENSG00000123560	PLP1	0.13	0.08	0.105	0.05	2.1
ENSG00000159915	ZNF233	0.11	0.1	0.105	0.05	2.1
ENSG00000160179	ABCG1	0.26	0.16	0.21	0.1	2.1
ENSG00000185565	LSAMP	0.22	0.2	0.21	0.1	2.1
ENSG00000203506	RBMS3-AS2	0.1	0.11	0.105	0.05	2.1
ENSG00000213373	LINC00671	0.08	0.13	0.105	0.05	2.1
ENSG00000227256	MIS18A-AS1	0.1	0.11	0.105	0.05	2.1
ENSG00000227482	RP11-18B16.2	0.19	0.65	0.42	0.2	2.1
ENSG00000244383	FAM3D-AS1	0.26	0.16	0.21	0.1	2.1
ENSG00000250166	RP11-268P4.5	0.05	0.16	0.105	0.05	2.1
ENSG00000255498	RP11-618K13.2	0.05	0.16	0.105	0.05	2.1
ENSG00000262619	LINC00621	0.14	0.28	0.21	0.1	2.1
ENSG00000264707	L3MBTL4-AS1	0.1	0.11	0.105	0.05	2.1
[truncated: 1,748 more rows]
